# Supplementary material for: Ozone affected by a succession of four landfall typhoons in the Yangtze River Delta, China: major processes and health impacts
Source: Copernicus journal article supplement (doi:10.5194/acp-2020-554), 2020-07-21
Supplement: Supplementary file [file acp-2020-554-AC2-supplement.pdf]

## **A point to point response to the reviewers' comments**

Thank you for the reviewers' comments on our manuscript entitled "Ozone affected by a succession of four landfall typhoons in the Yangtze River Delta, China: major processes and health impacts" (acp-2020-554). Those constructive comments are all valuable for revising and improving our manuscript, as well as the important guiding significance to our researches. We have studied those comments carefully and have made correction which we hope to meet with approval. Here are point to point responses (in blue colored). Accordingly, we also revised manuscript (in red colored).

### **Anonymous Referee #2:**

#### **General comments**

A typhoon over the Western Pacific, as a large scale weather system during East Asian summer monsoon season, can significantly affect the tropospheric O<sub>3</sub> as well as air quality in a large region. The manuscript investigated the Landfall typhoon significantly affecting O<sub>3</sub> in the Yangtze River Delta (YRD) region, East China in respects of major processes and health impacts. This unique case study presented the interesting results on major processes of O<sub>3</sub> change driven by a succession of four landfall typhoons. This topic fits well into the scope of ACP.

Response: We would like to express our great appreciation to you for your encouragement.

#### **Specific comments**

The manuscript should be considered for publication only after making minor revisions as follows:

Response: We thank the reviewer for the constructive comments, which are really important to improving our manuscript. We have carefully revised our manuscript as shown below.

1. Please clarify the implication and limitation of this study for air quality change. A three-dimensional circulation of typhoon consists of the rotational air flow in the horizontal direction and the in-up-out-down overturning flow in the vertical direction, along which air mass near the surface can rise into thunderstorm clouds, outflowing at high levels in the UTLS and subsiding in the periphery. To better discuss the link with three-dimensional circulation of typhoon, please

reference this ACP paper: Jiang, Y. Zhao, T., Liu, J., et al. Why does surface ozone peak before a typhoon landing in southeast China? . Atmos. Chem. Phys., 2015, 15, 13331-13338.

Response: Thanks for the constructive comment and the important reference. We are deeply sorry that we ignored the three-dimensional structure of typhoons, especially the process of stratosphere-troposphere exchange of O<sub>3</sub>. We have added this part, and reorganized the language in our revised manuscript. Please see lines 30-38 (Abstract), 410-422 (Sect. 3.3.2), 545-552 (Sect. 3.3.6), 634-641 (Sect. 4) and 728-730 (References) in the revised manuscript. Also, we have added a little implication to the discussion derived from the reference. Please see lines 564-565 (Sect. 3.3.6).

Figure R3 presents a fine map of temporal-vertical distribution of O<sub>3</sub> with vertical wind velocity over Shanghai, Hangzhou, Nanjing and Hefei between Typhoon Ampil and Typhoon Jongdari. Notably, O<sub>3</sub>-poor air has penetrated into the stratosphere with the help of deep convection during typhoon, while O<sub>3</sub>-rich air from the low stratosphere transported by downdrafts after typhoon. Combined with generated O<sub>3</sub> by photochemical reactions, high O<sub>3</sub> will appear in low troposphere. Moreover, the O<sub>3</sub> can remain at a high level in the residual at night, and can be transported to the surface by the second day. The transportation of O<sub>3</sub> in the upper layer plays an important role in the formation of O<sub>3</sub> pollution episodes on the surface.

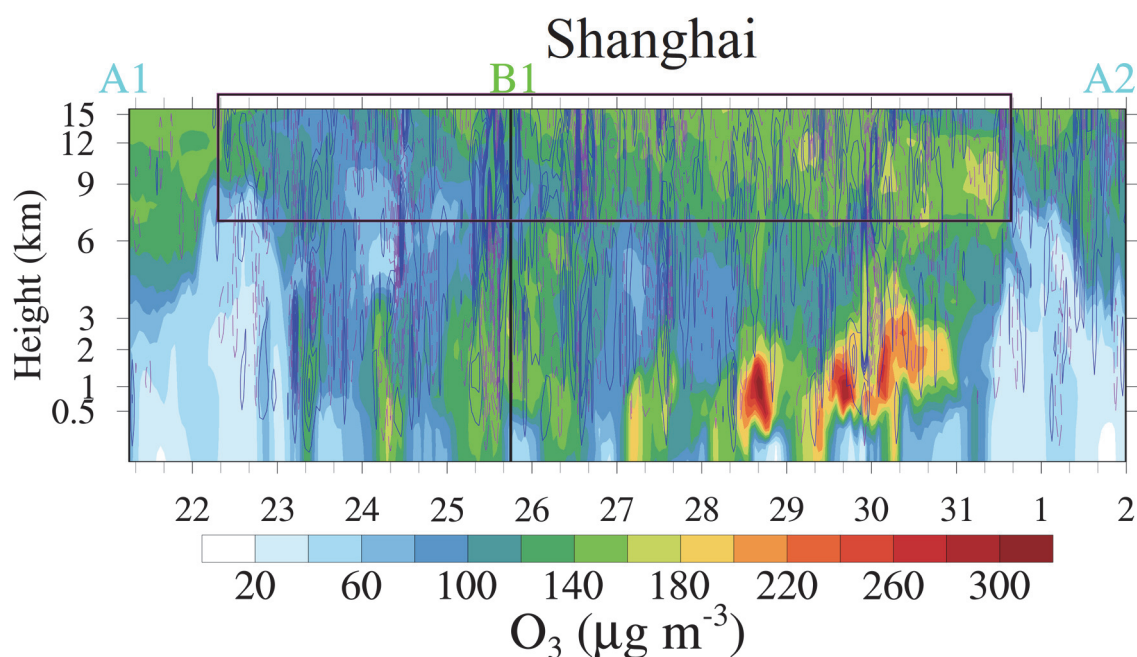

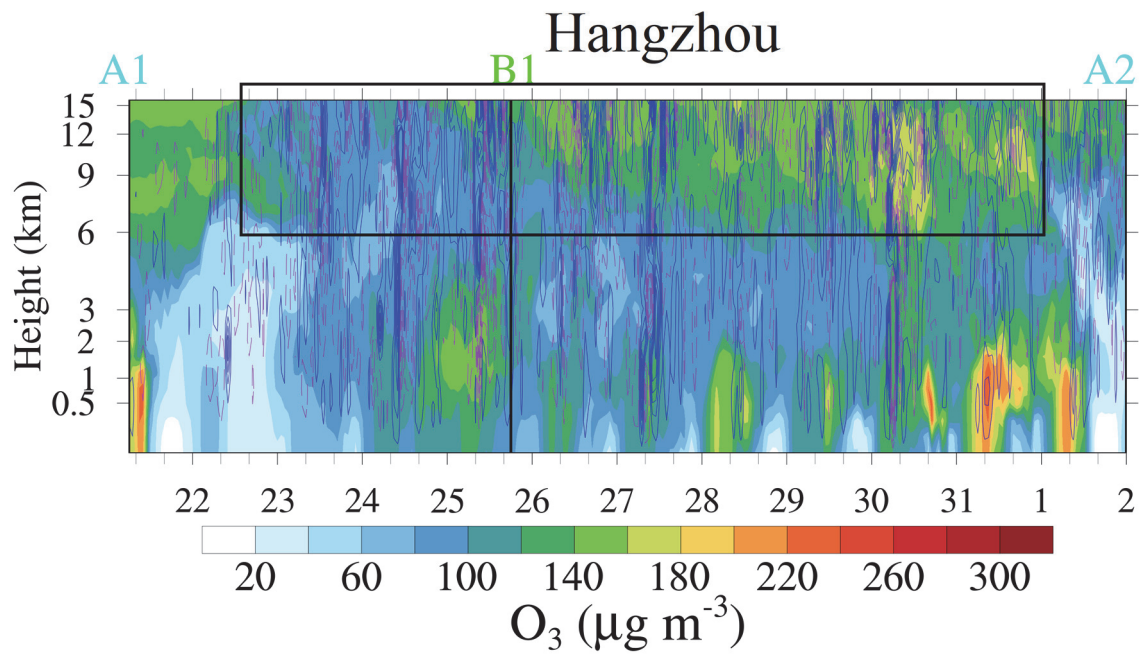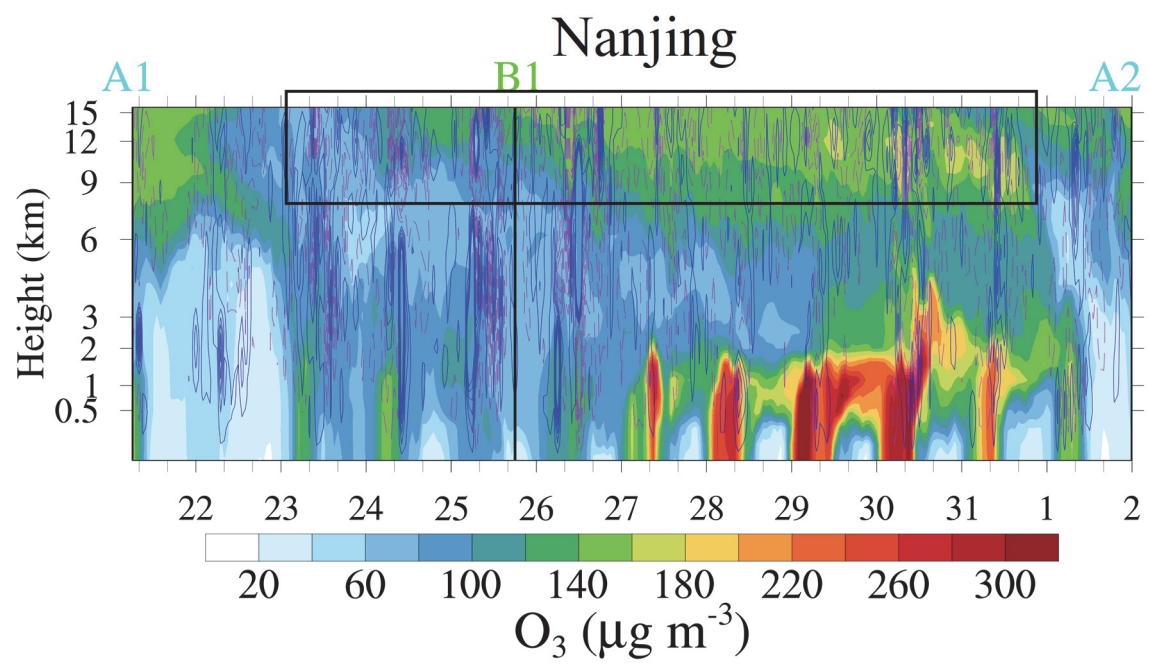

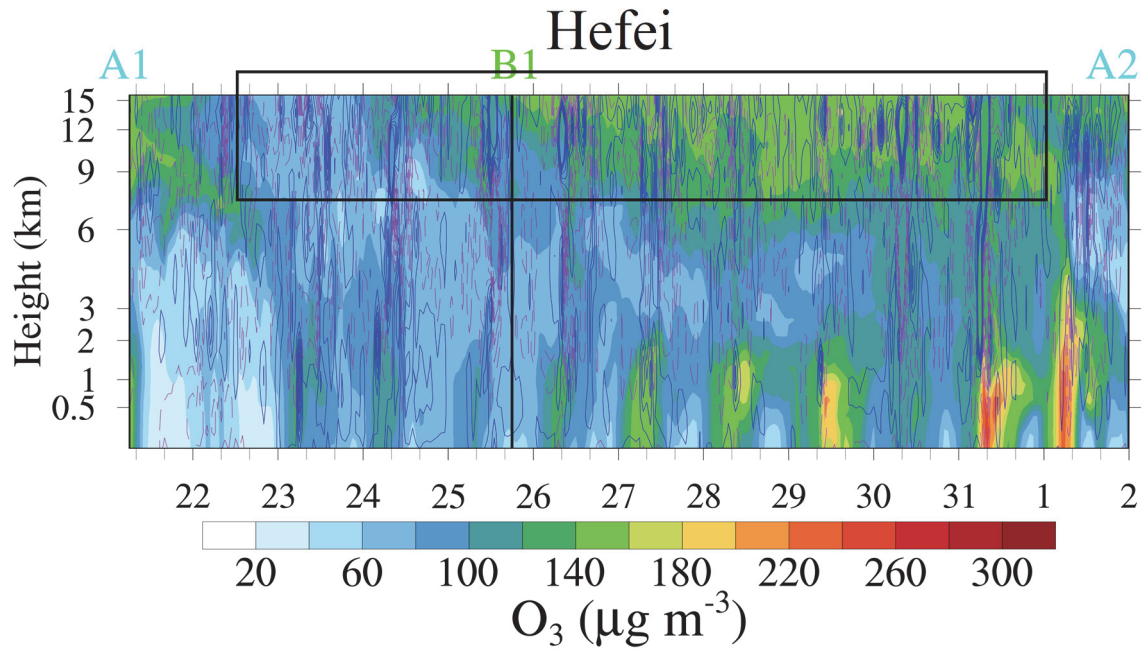

Figure R3: Temporal-vertical distribution of  $O_3$  with vertical wind velocity over Shanghai, Hangzhou, Nanjing and Hefei. The dotted purple line and solid blue line indicate the negative wind speeds (downward airflows) and positive wind speeds (upward airflows), respectively. The time refers to UTC. The black box indicates the area of stratosphere-troposphere exchange (STE).

2. All Figs. (a) and (b) in Figs 6, 8 and 9 are too tiny to identify. Please improve the Figure presentations with better quality.

Response: Thanks for the constructive comment. In our revised manuscript, we have enhanced the quality of these figures with higher resolution and larger font size. Please see lines 431-433 (Fig. 6), 475-477 (Fig. 8), 502-504 (Fig. 9) and 522-524 (Fig. 10) in the revised manuscript.

3. Lines 485-487: this statement that “The YRD region, which features a typical subtropical monsoon climate, is strongly influenced by the western Pacific subtropical high in summer.” is incorrect or incomplete. The YRD, as a typical region of East Asian monsoon climate, is strongly influenced by typhoon activities over the Western Pacific.

Response: Thanks for the comment and correction. In this revising, the reviewer’s suggestion is followed. “The YRD region, which features a typical monsoon climate, is strongly influenced by

the western Pacific subtropical high in summer” has been changed to “The YRD, as a typical region of East Asian monsoon climate, is strongly influenced by typhoon activities over the Western Pacific.”. Please see lines 530-534 (Sect. 3.3.6) in the revised manuscript.

4. In synoptics, the western Pacific subtropical high and tropical cyclone (Typhoon) over western Pacific are two large scale weather systems in opposition to each other. Therefore, please remove “The subtropical high”, and “High temperature, southeast wind, downward airflow” from Fig. 11, also please correct the corresponding discussions.

Response: We appreciate this constructive comment. We are sorry that we did not carefully examine the synoptic meaning of the western Pacific subtropical high and tropical cyclone (Typhoon) in the last version, and we have changed both the schematic diagram and the corresponding discussions in the revised manuscript. Please see lines 44-45 (Abstract), 533-534 (Sect. 3.3.6), 557- 558 (Fig. 11) and 627 (Sect. 4) in the revised manuscript.

# Ozone affected by a succession of four landfall typhoons in the Yangtze River Delta, China: major processes and health impacts

Chenchao Zhan <sup>a,1</sup>, Min Xie <sup>a,\*</sup>, Chongwu Huang <sup>a,1</sup>, ~~Jane Liu~~ <sup>b,c</sup>, Tijian Wang <sup>a</sup>, ~~Jane Liu~~ <sup>b,e</sup>, Meng Xu <sup>d</sup>, Chaoqun Ma <sup>a</sup>, Jianwei Yu <sup>e</sup>, Yumeng Jiao <sup>f</sup>, Mengmeng Li <sup>a</sup>, Shu Li <sup>a</sup>, Bingliang Zhuang <sup>a</sup>, Ming Zhao <sup>a</sup>, Dongyang Nie <sup>a</sup>

<sup>a</sup> School of Atmospheric Sciences, Joint Center for Atmospheric Radar Research of CMA/NJU, CMA-NJU Joint Laboratory for Climate Prediction Studies, Jiangsu Collaborative Innovation Center for Climate Change, Nanjing University, Nanjing 210023, China

<sup>b</sup> College of Geographic Sciences, Fujian Normal University, 350007, Fuzhou, China

<sup>c</sup> Department of Geography and Planning, University of Toronto, Toronto, Ontario, Canada

<sup>d</sup> Jiangsu Provincial Climate Center, Nanjing 210009, China

<sup>e</sup> Jiangsu Provincial Meteorological Observatory, Nanjing 210008, China

<sup>f</sup> Department of Microbiology and Parasitology, Bengbu Medical College, Bengbu 233030, China

\* Corresponding author. minxie@nju.edu.cn (M. Xie)

<sup>1</sup> The third author can be considered as the co-first author

**Abstract:** Landfall typhoon can significantly affect O<sub>3</sub> in the Yangtze River Delta (YRD) region. In this study, we investigate a unique case characterized by two multiday regional O<sub>3</sub> pollution episodes related to four successive landfall typhoons in the summer of 2018 in the YRD. The results show that O<sub>3</sub> pollution episodes mainly occurred during the period from the end of a typhoon ~~to and~~ the arrival of the next typhoon. The time when a moment that typhoon reached the 24-h warning line and the time when the last moment of typhoon ~~dies away~~ activity in the mainland China can be roughly regarded as time nodes. Meanwhile, the variations of O<sub>3</sub> was related to the track, duration and landing intensity of the typhoons. The impact of typhoons s on O<sub>3</sub> was like a wave superimposed on the background of high O<sub>3</sub> concentration in the YRD in summer. When a typhoon was near the 24-h warning line before it landed the coast line of the YRD, the prevailing wind originally from the ocean changed to from the inland, and transported lots of precursors from the polluted areas to the YRD. Under influences of the ~~With~~ typhoon, the low temperature, strong upward airflows, more

31 precipitation and wild wind ~~hindered occurrences of prevented~~ high O<sub>3</sub> episodes. After ~~the passing~~  
32 ~~of the~~ typhoon, the air below the 700 hPa atmospheric layer was warm and dry, ~~and the downward~~  
33 ~~airflows resumed. The low troposphere was filed with high concentration of O<sub>3</sub> due to O<sub>3</sub>-rich air~~  
34 ~~transported from the low stratosphere and strong photochemical reactions. which was conducive to~~  
35 ~~the formation of O<sub>3</sub> from the abundance of precursors.~~ It is note-worthy that O<sub>3</sub> ~~was~~ mainly  
36 generated in the middle of boundary layer (~ 1000 m) ~~instead of at the surface.~~ High O<sub>3</sub> remained  
37 ~~in the residual layer at night, and would and be then~~ transported to the surface by downward airflows  
38 or turbulences ~~by the second day~~. Moreover, O<sub>3</sub> can be accumulated and trapped on the ground due  
39 to the poor diffusion conditions because the vertical diffusion and horizontal diffusion were  
40 suppressed by downward airflows and light wind, respectively. The premature mortalities attributed  
41 to O<sub>3</sub> exposure in the YRD during the study period ~~was~~ 194.0, more than the casualties caused  
42 directly by the typhoons. This work ~~has enhanced~~ our understanding of how landfall typhoons  
43 affect O<sub>3</sub> in the YRD ~~and thus can be useful, which can be helpful~~ to forecast ~~the~~ O<sub>3</sub> pollution  
44 ~~synthetically impacted by the subtropical high and typhoon in regions strongly influenced by~~  
45 ~~typhoon activities.~~

46 **Key Words:** ozone; landfall typhoon; the Yangtze River Delta region;

## 48 1 Introduction

49 The tropospheric ozone (O<sub>3</sub>), which is formed by a series of complex photochemical reactions  
50 between volatile organic compounds (VOCs) and nitrogen oxides (NO<sub>x</sub>=NO+NO<sub>2</sub>) in combination  
51 with sunlight (Chameides and Walker, 1973; Xie et al., 2014), has received continuous attention due  
52 to its negative impact on air quality (Chan and Yao, 2008; Monks et al., 2015), human health (Jerrett  
53 et al., 2009), climate (Allen et al., 2012; IPCC, 2014) and biosphere (Dingenen et al., 2009).  
54 Research on urban O<sub>3</sub> pollution can ~~be dated~~ back to the early 1950s, beginning with the Los Angeles  
55 smog. In China, the photochemical smog, which is characterized by high level of O<sub>3</sub>, was first  
56 discovered in Xigu district of Lanzhou in 1970s (Tang et al., 1989). However, with the key  
57 atmospheric environmental problem was coal-smoke pollution (such as acid rain) at that time (Wang  
58 et al., 2019), little systematic research and coordinated O<sub>3</sub> monitoring were performed in China until  
59 the mid-2000s (Wang et al., 2017).

60 Since the beginning of ~~the~~ 21st century, the complex air pollution, which is dominated by fine

61 particulate matter (PM<sub>2.5</sub>, particles of 2.5 microns or less in aerodynamic diameter) and surface O<sub>3</sub>,  
62 has been ingrained in the megacities of China (Chan and Yao, 2008; Jin et al., 2016; Kan et al.,  
63 2012). Air pollution has evolved into a political and economic concern in China. Due to ~~the~~  
64 ~~strict~~~~drastic~~ air pollution control since 2013, particle pollution has been greatly reduced, appearing  
65 a significantly decrease in sulfur dioxide (SO<sub>2</sub>), NO<sub>x</sub> and PM<sub>2.5</sub>. However, the concentrations of O<sub>3</sub>  
66 and VOCs have ~~ved~~~~an~~ increased from 2013 to 2017 (Li et al., 2017), suggesting that more attention  
67 should be paid to controlling O<sub>3</sub> and VOCs in the future. Overall, the causes of air pollution ~~and the~~  
68 ~~control policies in China~~ are ~~remaining still a major~~ challenges ~~to confront in China~~, especially in  
69 understanding the sources, transport and dispersion processes, and chemical formation mechanisms  
70 of O<sub>3</sub> and its precursors (Ding et al., 2016; Guo et al., 2014; Huang et al., 2014).

71 ~~A t~~Typhoon (tropical cyclone, TC) is one of the most ~~severe~~~~important factors of~~ natural  
72 disasters in East Asia. Out of the total provinces in China, 10 coastal and 6 island provinces are  
73 affected by typhoon induced disasters, with more than 250 million lives are affected (Liu et al.,  
74 2009). The average number of typhoons making landfall in China is 9 each year, and those typhoons  
75 usually inflict vast losses in human life and property due to the accompanied strong wind, torrential  
76 rains and huge storm surges (Zhang et al., 2009; Zhao et al., 2012). Because of the long lifetime and  
77 tremendous energy, typhoons ~~can~~~~has a~~ significantly ~~impact~~~~influence on~~ local atmospheric  
78 conditions, and thereby can affect surface O<sub>3</sub> concentration through advection, diffusion, deposition  
79 and other processes. The impact of typhoons on O<sub>3</sub> has attracted extensive attention in recent years  
80 (Deng et al., 2019; Huang et al., 2005; [Jiang et al., 2015](#); Shu et al., 2016; Wang and Kwok, 2002;  
81 Wei et al., 2016; Yang et al., 2012). For example, Deng et al. (2019) reported that high O<sub>3</sub> and high  
82 aerosol concentrations (double high episodes) are likely to occur when the PRD is under the control  
83 of ~~the~~ typhoon periphery and ~~the~~ subtropical high with strong downdrafts. Previous studies were  
84 mainly in the southern China (including Hong Kong and Taiwan), where ~~are frequently affected by~~  
85 typhoons ~~occur frequently~~. ~~Still~~~~However~~, research on the impact of landfall typhoons on O<sub>3</sub> is  
86 ~~rather~~~~still~~ limited.

87 The Yangtze River Delta (YRD) region, being one of the most developed and densely  
88 populated regions in China, is located on the western coast of the Pacific Ocean. With 3.7% of the  
89 area and 16.0% of the population of China, the YRD contributed over 20% of the national total  
90 Gross Domestic Product (GDP) in 2019. Due to the rapid economic development and high energy



91 consumption, this region ~~has been is~~ suffering from intense air pollution (Ding et al., 2013; Li et al.,  
92 2019; Wang et al., 2015; Xie et al., 2016). In 2017, the 90th percentile of the maximum daily 8-hour  
93 average (MDA8) O<sub>3</sub> concentration was 170 μg m<sup>-3</sup>, and 16 of the 26 cities (Figure 1b) in the YRD  
94 failed to meet national standard ([http://www.cnemc.cn/jcbg/zghjzkgb/201905/t20190529\\_704755.html](http://www.cnemc.cn/jcbg/zghjzkgb/201905/t20190529_704755.html)). Therefore, it is ~~an urgent task~~ to investigate the spatiotemporal characteristic of O<sub>3</sub> as well as  
95 its formation mechanisms in the YRD. Influenced by ~~the~~ monsoon weather, the warm and stagnation  
96 conditions play an important role in the occurrence of high-level O<sub>3</sub> in summer (Li et al., 2018; Liao  
97 et al., 2015; Lu et al., 2018; Zhao et al., 2010). Synoptic weather systems, such as typhoons and  
98 cold fronts, ~~can also have~~ significantly ~~impacted effects on~~ O<sub>3</sub> in the YRD (Hu et al., 2013; Shu et al.,  
99 2016). This work aims to reveal the main processes of landfall typhoon affecting surface O<sub>3</sub> in the  
100 YRD, ~~hoping to~~ fill the knowledge gap and ~~thus provide scientific insight be helpful for~~  
101 ~~effective making reasonable~~ pollution control measures.

103 In this study, we report a ~~typical outstanding~~ case observed in the YRD during the period from  
104 16 July to 25 August, 2018, during which multiday episode of high O<sub>3</sub> occurred and was ~~found to~~  
105 ~~be~~ related to four successive landfall typhoons. Base on the monitoring data and numerical  
106 simulation, we ~~further~~ explore the impact of landfall typhoons on O<sub>3</sub> in the YRD, including the  
107 major processes and health impacts. The following part of this paper is structured as the follows:  
108 Section 2 gives a brief description of monitoring data, the analysis methods, and model  
109 configurations. The results as well as the discussions are detailed in section 3. Section 4 summarizes  
110 the main conclusions.

111

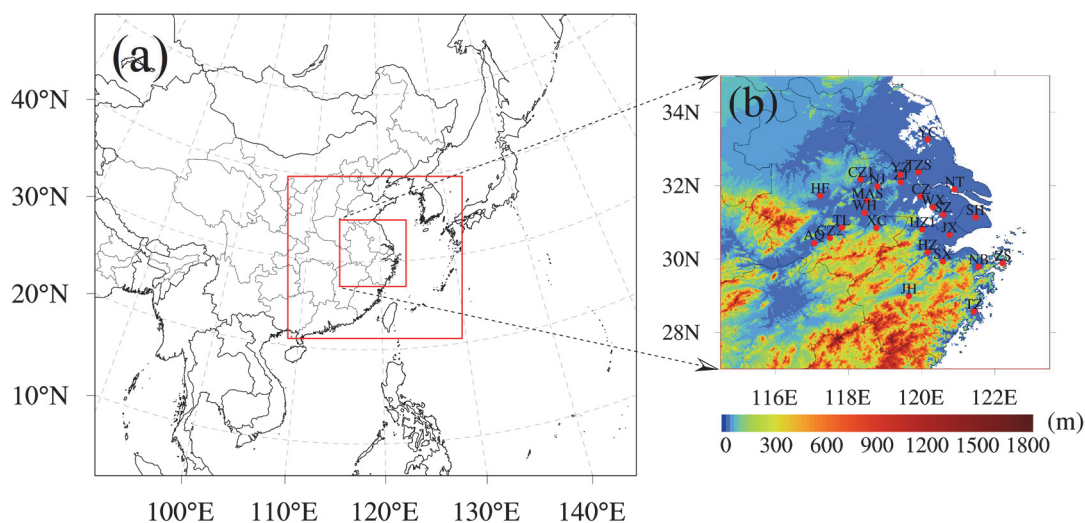

112

113 **Figure 1. The three nested modeling domains (a) in WRF, and the locations of 26 typical cities**  
 114 **in the YRD with terrain elevation data (b). The cities in (b) include: Nanjing (NJ), Wuxi (WX),**  
 115 **Changzhou (CZ), Suzhou (SZ), Nantong (NT), Yancheng (YC), Yangzhou (YZ), Zhenjiang (ZJ)**  
 116 **and Taizhoushi (TZS) located in Jiangsu province; Hangzhou (HZ), Ningbo (NB), Jiaxing (JX),**  
 117 **Huzhou (HZ1), Shaoxing (SX), Jinhua (JH), Zhoushan (ZS) and Taizhou (TZ) located in**  
 118 **Zhejiang province; Hefei (HF), Wuhu (WH), Maanshan (MAS), Tongling (TL), Anqing (AQ),**  
 119 **Chuzhou (CZ1), Chizhou (CZ2) and Xuancheng (XC) located in Anhui province; and the**  
 120 **megacity Shanghai (SH). The terrain elevation data are available at**  
 121 [https://www.ngdc.noaa.gov/mgg/global/relief/ETOPO1/data/bedrock/cell\\_registered/netcdf/](https://www.ngdc.noaa.gov/mgg/global/relief/ETOPO1/data/bedrock/cell_registered/netcdf/).

122

## 123 **2 Data and methods**

### 124 **2.1 Air quality data**

125 Surface air pollutants monitored by the China National Environmental Monitoring Center  
 126 (CNMC) Network are used in this study. The nationwide observation network began operating in  
 127 74 major cities in 2013, and it included 1597 nonrural sites covering 454 cities by 2017 (Lu et al.,  
 128 2018). The monitoring data are strictly in accordance with the national monitoring regulations  
 129 (<http://www.cnemc.cn/jcgf/dqhj/>), and can be acquired from the national urban air quality real-time  
 130 publishing platform (<http://106.37.208.233:20035/>). Each monitoring site automatically measures  
 131 hourly air pollutants (PM<sub>2.5</sub>, PM<sub>10</sub>, SO<sub>2</sub>, NO<sub>2</sub>, O<sub>3</sub> and CO), and the urban hourly pollutants are  
 132 calculated by averaging the pollutants measured at all monitoring sites in that city. The MDA8 O<sub>3</sub>

133 is calculated based on the hourly O<sub>3</sub> with more than 18-h measurements (Liao et al., 2017). Manual  
134 inspection, including the identification and handling of invalid and lacking data, is performed  
135 following previous studies (Xie et al., 2016; Shu et al., 2017; Zhan et al., 2019).

## 136 2.2 Surface and sounding meteorological data

137 With respect to surface observed meteorological data, stations at the three provincial capital  
138 cities (~~Hefei~~, Nanjing ~~and~~, Hangzhou ~~and~~ Hefei) and the megacity Shanghai are selected, which  
139 are ~~ZSOF (117.23°E, 31.87°N)~~, ZSNJ (~~32.00°N~~, 118.80°E, ~~32.00°N~~), ZSHC (~~30.23°N~~, 120.17°E,  
140 ~~30.23°N~~), ~~ZSOF (31.87°N, 117.23°E)~~ and ZSPD (~~31.12°N~~, 121.77°E, ~~31.12°N~~), respectively. These  
141 surface observations, including 2-m temperature, 10-m wind speed and direction and 2-m relative  
142 humidity, are recorded hourly and can be obtained from the website of the University of Wyoming  
143 (<http://weather.uwyo.edu/surface/>). ~~The precipitation data is not included in the dataset.~~

144 To verify the upper-air fields, the sounding observations at Shanghai (~~31.40°N~~, 121.46°E,  
145 ~~31.40°N~~) and Nanjing (~~32.00°N~~, 118.80°E, ~~32.00°N~~) are used. These sounding observations  
146 (pressure, temperature, relative humidity, wind direction and wind speed etc.) are also acquired from  
147 the website of the University of Wyoming (<http://weather.uwyo.edu/upperair/sounding.html>), with  
148 a time resolution of 12 h (00:00 and 12:00 UTC).

## 149 2.3 The best-track TC dataset

150 To capture the characteristics of landfall typhoons, the best-track TC dataset issued by the  
151 China Meteorological Center (CMA) is considered due to its good performance on the landfall  
152 typhoons in the mainland China (available at [http://tcddata.typhoon.org.cn/zjljsjj\\_sm.html](http://tcddata.typhoon.org.cn/zjljsjj_sm.html)). The  
153 dataset covers seasons from 1949 to the present, the region north of the equator and west of 180°E,  
154 and is updated annually (Li and Hong, 2016; Ying et al., 2014). A wealth of information on typhoon  
155 is recorded every 6h in the dataset, including location, minimum sea level pressure, etc. For landfall  
156 typhoons, 24h before ~~their landing y land~~ and during their activities in the mainland China, the  
157 ~~meteorological~~ data ~~are will be~~ recorded every 3h. Refer to the national standard for grade of tropical  
158 cyclones (GB/T 19201-2006), the intensity category (IC) of tropical cyclones is ~~provided given~~ in  
159 the dataset, which is based on the near surface maximum 2-min mean wind speed near the tropical  
160 cyclone center, rang~~ing~~es from 1 to 6 (Table 1).

161

162 **Table 1. The intensity category of tropical cyclones**

| Intensity category (IC)      | The near surface maximum 2-min mean wind speed near the tropical cyclone center (m/s) | Beaufort scale |
|------------------------------|---------------------------------------------------------------------------------------|----------------|
| Tropical depression (IC=1)   | 10.8-17.1                                                                             | 6-7            |
| Tropical storm (IC=2)        | 17.2-24.4                                                                             | 8-9            |
| Severe tropical storm (IC=3) | 24.5-32.6                                                                             | 10-11          |
| Typhoon (IC=4)               | 32.7-41.4                                                                             | 12-13          |
| Severe typhoon (IC=5)        | 41.5-50.9                                                                             | 14-15          |
| Super typhoon (IC=6)         | ≥ 51.0                                                                                | ≥16            |

163

#### 164 **2.4 Model description and configurations**

165 To simulate the high O<sub>3</sub> episodes over the YRD during the ~~period with~~ typhoon periods, the  
166 WRF-CMAQ one-way coupled model is applied, which consists of WRF v3.6.1  
167 (<https://www2.mmm.ucar.edu/wrf/users/>) developed by the United States National Center for  
168 Atmospheric Research (NCAR) and CMAQ v5.0.2 (<https://github.com/USEPA/CMAQ/tree/5.0.2>)  
169 developed by the United States Environmental Protection Agency (EPA).

170 WRF generates offline meteorological inputs for CMAQ with initial and boundary conditions  
171 from the National Centers for Environmental Prediction (NCEP) global final analysis fields every  
172 6 h at a spatial resolution of 1° × 1° (<https://rda.ucar.edu/datasets/ds083.2/>). Three nested domains  
173 are used, with horizontal resolutions of 81, 27 and 9 km, and grids of 88 × 75, 85 × 79 and 97 × 97,  
174 respectively (Figure 1a). There are 24 vertical sigma layers from surface to 100 hPa, with about 8  
175 layers located below 1.5 km to resolve the boundary layer processes. Furthermore, the major  
176 physical options for the dynamic parameterization in WRF are summarized in Table 2.

177

178 **Table 2. The domains and physical options for WRF in this study**

| Items              | Contents                                             |
|--------------------|------------------------------------------------------|
| Dimensions (x, y)  | (88, 75), (85, 79), (97, 97)                         |
| Grid spacing (km)  | 81, 27, 9                                            |
| Microphysics       | WRF Single-Moment 5-class scheme (Hong et al., 2004) |
| Longwave radiation | RRTM scheme (Mlawer et al., 1997)                    |

---

|                          |                                                         |
|--------------------------|---------------------------------------------------------|
| Shortwave radiation      | Goddard scheme (Kim and Wang, 2011)                     |
| Surface layer            | Moni-Obukhov scheme (Monin and Obukhov, 1954)           |
| Land-surface layer       | Noah land-surface model (Chen and Dudhia, 2001)         |
| Planetary boundary layer | YSU scheme (Hong et al., 2006)                          |
| Cumulus parameterization | Grell-Devenyi ensemble scheme (Grell and Devenyi, 2002) |

---

179

180        Since the horizontal domains of CMAQ are one grid smaller than WRF, all three nested  
181 domains are adjusted automatically. The vertical layers of CMAQ are the same as WRF. The  
182 Meteorology Chemistry Interface Processor (MCIP) can convert WRF outputs to the necessary  
183 meteorological inputs for CMAQ. Moreover, the CB05 gas-phase mechanism with aqueous/cloud  
184 chemistry is selected in the CMAQ configurations.

185        The anthropogenic emissions are from the Multi-resolution Emission Inventory for China  
186 (MEIC) in 2016 with the resolution of 0.25° (<http://meicmodel.org/>), including anthropogenic  
187 emissions from power generation, industry, agriculture, residential and transportation sectors. All  
188 emission estimates are spatially allocated to the relevant grid cells based on the meteorological fields  
189 obtained from WRF, and are temporally distributed on an hourly basis. The simulation starts from  
190 00:00 UTC on 13 July to 00:00 UTC 27 August, with the first 72 h as spin-up time.

## 191 **2.5 Integrated process rate (IPR) analysis**

192        To quantify the contributions of individual processes ~~to~~ O<sub>3</sub> formation, the IPR analysis  
193 provided in the CMAQ is utilized. The IPR analysis can illustrate the contributions to changes in  
194 pollutant concentrations from seven different types of processes, including horizontal advection  
195 (HADV), vertical advection (ZADV), horizontal diffusion (HDIF), vertical diffusion (VDIF), dry  
196 deposition (DDEP), cloud processes with the aqueous chemistry (CLDS) and chemical reaction  
197 process (CHEM), with a mass conservation adjustment at each model grid cell. The IPR analysis  
198 has been widely applied to investigate regional air pollution (Fan et al., 2015; Li et al., 2012; Wang  
199 et al., 2010). In this study, MADV is defined as the sum of HADV and ZADV, and TDIF is defined  
200 as the sum of HDIF and VDIF.

## 201 **2.6 Model evaluation**

202        To evaluate the model performance, the simulation results in the innermost domain, including  
203 O<sub>3</sub> concentration, air temperature at 2 m (T<sub>2</sub>), relative humidity (RH), wind speed at 10 m (WS<sub>10</sub>)

204 and wind direction at 10 m (WD<sub>10</sub>), are examined against the hourly observations at the  
 205 representative cities (Table 3). The statistical metrics, including correlation coefficient (R), root-  
 206 mean-square error (RMSE) and normalized mean bias (NMB), are used ~~in this study~~. They are  
 207 defined as follows:

$$208 \quad R = \frac{\sum_{i=1}^N (S_i - \bar{S})(O_i - \bar{O})}{\sqrt{\sum_{i=1}^N (S_i - \bar{S})^2} \sqrt{\sum_{i=1}^N (O_i - \bar{O})^2}}, \quad (3)$$

$$209 \quad RMSE = \sqrt{\frac{\sum_{i=1}^N (S_i - O_i)^2}{N}}, \quad (4)$$

$$210 \quad NMB = \frac{\sum_{i=1}^N (S_i - O_i)}{\sum_{i=1}^N O_i} \times 100\%, \quad (5)$$

211 where  $S_i$  and  $O_i$  are the simulations and observations, respectively.  $N$  is the total number of valid  
 212 data.  $\bar{S}$  and  $\bar{O}$  are the average value of simulations and observations, respectively. In general, the  
 213 model results are acceptable if the values of  $R$ ,  $RMSE$  and  $NMB$  are close to 1, 0 and 0, respectively  
 214 (Li et al., 2017; Shu et al., 2016; Xie et al., 2016).

## 215 **2.7 Estimate of health impacts**

216 Previous studies showed that surface  $O_3$  pollution can induce a series of adverse health  
 217 problems impacts by causing from the incidence and mortality of respiratory diseases (Ghude et al.,  
 218 2016; Jerrett et al., 2009; Lelieveld et al., 2015). To arouse more attention on the issue that  $O_3$  can  
 219 be significantly affected by typhoons in the YRD, we further estimate the premature mortality  
 220 attributed to  $O_3$  during the study period.

221 A standard damage function (Anenverg et al., 2010; Liu et al., 2018; Voorhees et al., 2014;  
 222 WS/T 666-2019, Technical specifications for health risk assessment of ambient air pollution of  
 223 China) is employed to quantify premature mortality due to  $O_3$  exposure:

$$224 \quad \Delta M = y_0 \left( \frac{RR - 1}{RR} \right) Pop, \quad (1)$$

225 where  $\Delta M$  is the excess mortalities attribute to  $O_3$  exposure,  $y_0$  is the baseline mortality rate,  $RR$  is  
 226 relative risk and  $(RR-1)/RR$  is the attributable fraction, and  $Pop$  is the exposed population.  $RR$  can

227 be calculated using the following relationship:

$$228 \quad RR = \exp(\beta(C - C_0)), \quad (2)$$

229 where  $\beta$  is the concentration-response factor,  $C$  is the exposure concentration and  $C_0$  represents the  
230 theoretical minimum-risk concentration.

231 In this study, the mortality rate for respiratory disease is obtained from China Health and  
232 Family Planning Statistical Yearbook 2018 ([https://www.yearbookchina.com/navibooklist-](https://www.yearbookchina.com/navibooklist-n3018112802-1.html)  
233 [n3018112802-1.html](https://www.yearbookchina.com/navibooklist-n3018112802-1.html)), which is 68.02/100000. The  $\beta$  is generated from Dong et al. (2016), that is  
234 0.461%. The population data are obtained from the Bureau of Statistics of different cities in the  
235 YRD. The  $C_0$  is  $70 \mu\text{g m}^{-3}$  for MDA8  $\text{O}_3$  given by the World Health Organization (WHO).

236

### 237 **3 Results and discussions**

#### 238 **3.1 Characteristic of $\text{O}_3$ episodes**

239 In the midsummer ~~season~~, the warm sea surface (high temperature) is conducive to the  
240 generation of typhoons (high  $\text{O}_3$  concentration), ~~which~~ providing a good opportunity to investigate  
241 the mechanism of typhoons affecting  $\text{O}_3$  in the YRD. Figure 2 shows the MDA8  $\text{O}_3$  in the typical  
242 26 cities of the YRD in summer of 2018. Actually, it is common for typhoons to affect  $\text{O}_3$  in the  
243 YRD during summer, and 2018 is special because there were 8 landfall typhoons and many of them  
244 landed further north than in the normal years (see Supplement for details).  $\text{O}_3$  concentration was  
245 relatively ~~tended to be~~ high in June, and relatively low in July and August. The relatively low  $\text{O}_3$   
246 may be attributed to the maritime air masses transported by the Asian summer monsoon (Ding et  
247 al., 2008; Xu et al., 2008). Nevertheless, we notice that there are two regional multiday  $\text{O}_3$  pollution  
248 episodes from 24 July to 11 August in the YRD, which means that about half of the cities in the  
249 YRD exceed the national air quality standard (The national ambient air quality standard for MDA8  
250  $\text{O}_3$  is  $160 \mu\text{g m}^{-3}$  in China). The first multiday  $\text{O}_3$  episodes appeared in most of the cities from 24  
251 July to 2 August. The highest MDA8  $\text{O}_3$  concentration reached up to  $264 \mu\text{g m}^{-3}$  on 27 July in  
252 Ningbo (NB).  $\text{O}_3$  pollution was even observed for 6 consecutive days from 27 July to 1 August in  
253 Maanshan (MAS). Only two days later, regional  $\text{O}_3$  pollution occurred in the YRD again from 5  
254 August to 11 August.

255

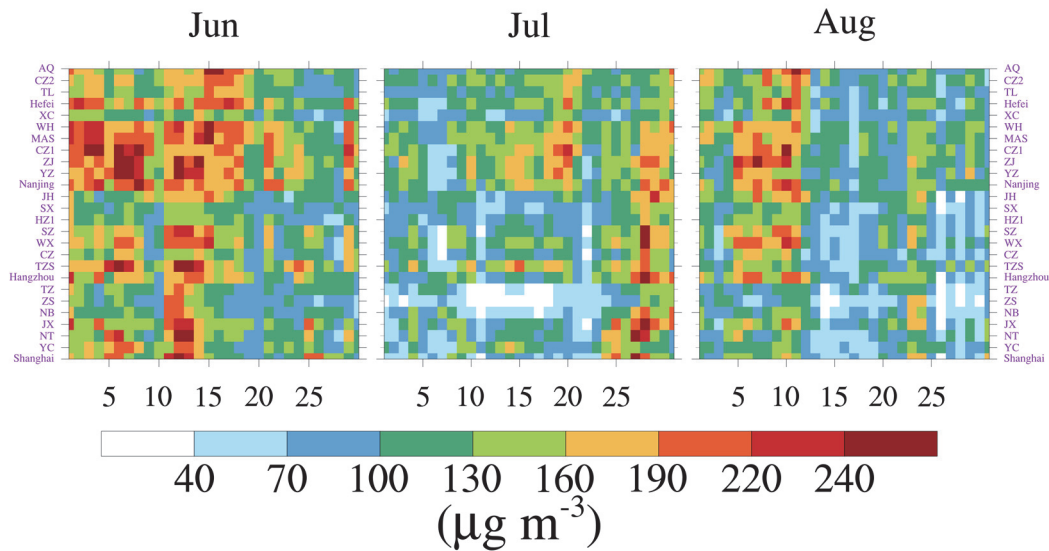

256  
 257 **Figure 2. The MDA8 O<sub>3</sub> in 26 cities of the YRD in June (left panel), July (middle panel), and**  
 258 **August (right panel) 2018summer of 2018. The national ambient air quality standard for**  
 259 **MDA8 O<sub>3</sub> is 160 µg m<sup>-3</sup> in China. These cities are sorted by longitude.**

260  
 261 Figure 3 further shows diurnal variation of O<sub>3</sub> in all 26 cities of the YRD from 00:00 16 July  
 262 to 00:00 25 August (throughout this paper the time refers to UTC, unless LST is specifically  
 263 stated mentioned). Interestingly, O<sub>3</sub> pollution occurred earlier in cities near the coastline (e.g. large  
 264 longitudes in °E, Figure 1b) rather than concurrently during the two multiday O<sub>3</sub> episodes. For  
 265 example, from 24 July to 2 August, the first day that hourly O<sub>3</sub> concentration exceeded the national  
 266 air quality standard (The national ambient air quality standard for hourly O<sub>3</sub> is 200 µg m<sup>-3</sup> in China)  
 267 in Shanghai, Hangzhou, Nanjing and Hefei was 24 July, 27 July, 28 July and 31 July, respectively.  
 268 Thus, we classify the 26 cities in the YRD into four categories based on their longitudes, surrounding  
 269 the four representative cities (Figure 4). The category I cities include SH, YC, NT, JX, NB, ZS and  
 270 TZ. The category II cities include HZ, TZS, CZ, WX, SZ, HZ1, SX and JH, and the category III  
 271 cities include NJ, YZ, ZJ, CZ1, MAS, WH and XC. Other cities are classified as the category IV  
 272 cities, which are HF, TL, CZ2 and AQ. The first category cities are closest to the coastline, while  
 273 the fourth category is the opposite.

274



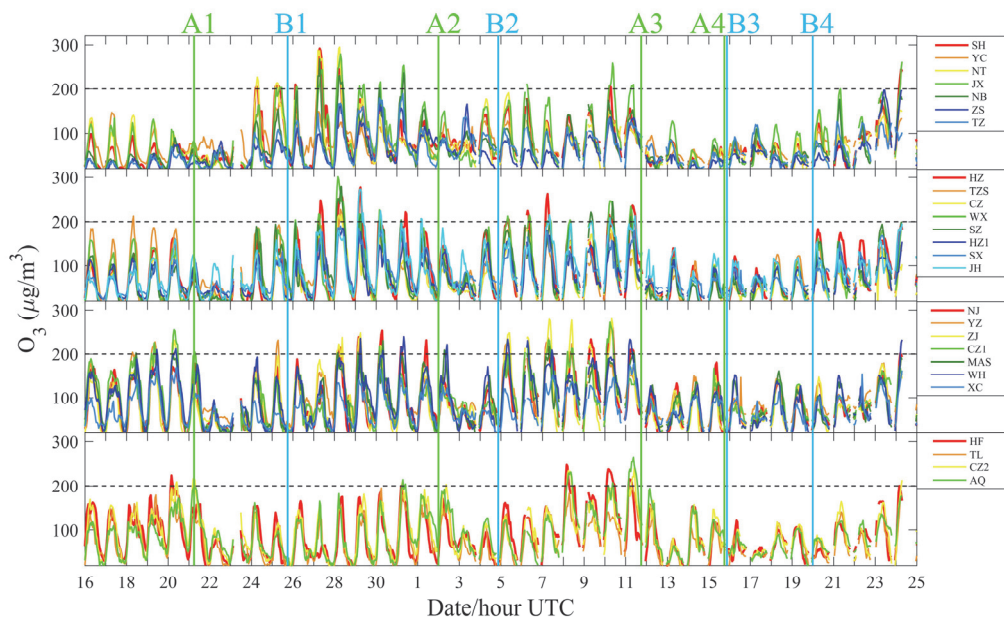

275

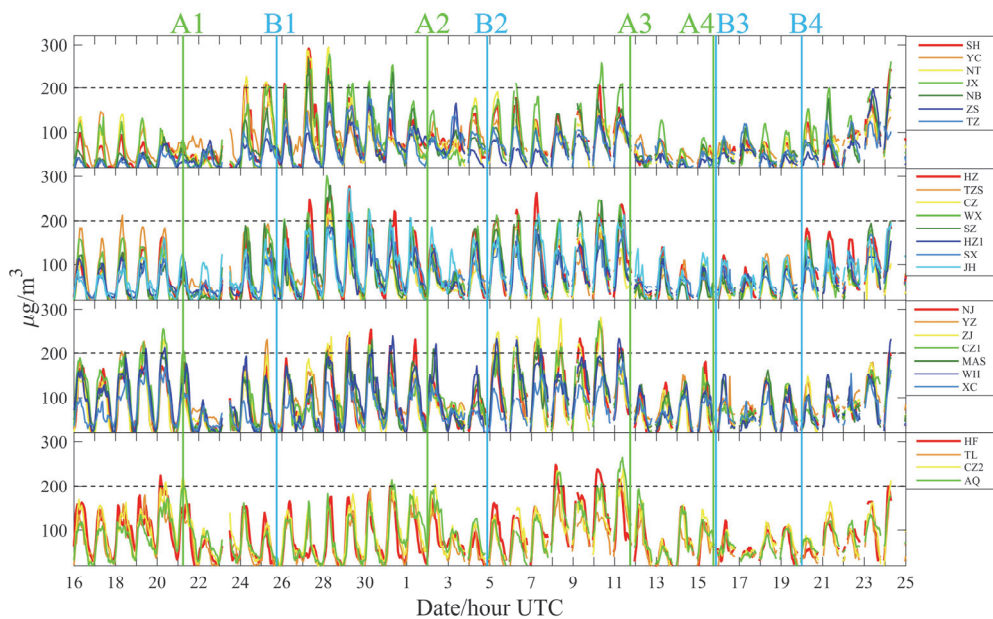

276

277 **Figure 3. Diurnal variation of O<sub>3</sub> in all 26 cities of the YRD from 16 June to 25 August, 2018.**

278 **The grey dotted lines are the national ambient air quality standard for hourly O<sub>3</sub> (200 μg m<sup>-3</sup>)**

279 **in China. The letter A indicates the moment that the typhoon has reached the 24-h warning**

280 **line, and letter B indicates the last moment when the typhoon was active in the**

281 **mainland China. These time moments are acquired from the best-track TC dataset, depending**

282 **on the start and end times of the 3h densified observations. Coordinates 1, 2, 3, and 4 represent**

283 **Typhoon Ampil, Typhoon Jongdari, Typhoon Yagi, and Typhoon Rumbia, respectively. Note:**

284 **these cities are sorted by longitude.**

285

### 286 3.2 Landfall typhoons and their effects

287 ~~For such~~ O<sub>3</sub> episodes with regional ~~and~~, long-lasting characteristics, may often be associated  
288 with slow-moving synoptic weather systems. We find that the O<sub>3</sub> episodes coincided well with  
289 ~~activities of~~ landfall typhoons ~~activities, showing in their~~ and ~~the~~ tracks and intensities ~~of typhoons~~  
290 ~~are given~~ in Figure 4. Typhoon Ampil was first observed at 00:00 on 18 July, and landed in Shanghai  
291 around 4:30 on 22 July with an intensity of severe tropical storm (IC=3). ~~While During the time of~~  
292 Typhoon Ampil ~~remained active~~, Typhoon Jongdari generated over the western North Pacific at  
293 12:00 on 23 July, and made landfall at the junction of Zhejiang province and Shanghai at 21:00 1  
294 August. After Typhoon Jongdari, Typhoon Yagi generated at 00:00 7 August. At around 15:35 12  
295 August, it landed in Zhejiang province and remained active in the mainland China until 21:00 15  
296 August. Before the end of Typhoon Yagi, Typhoon Rumbia was observed over the western North  
297 Pacific at 6:00 14 August. It finally landed in Shanghai at around 20:00 16 August, causing huge  
298 economic losses.

299

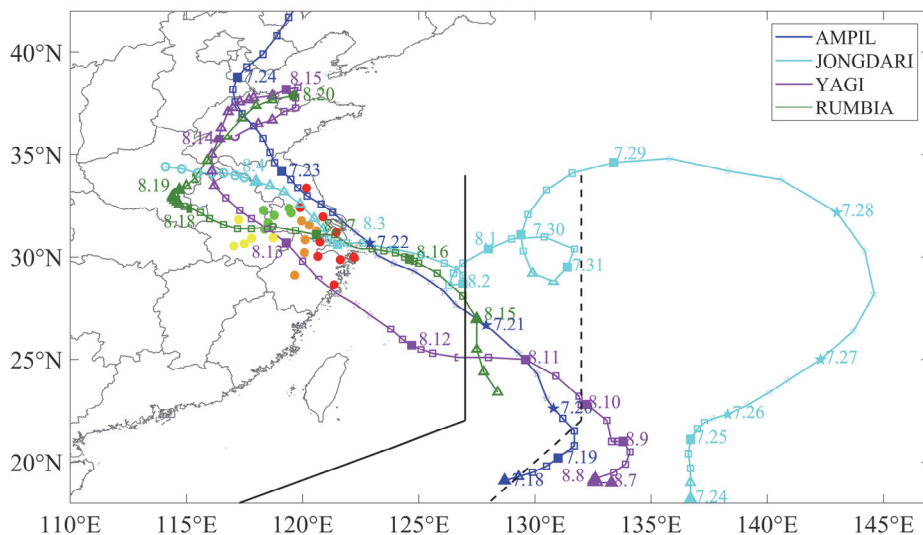

300

301 **Figure 4. The track and intensity of Typhoon Ampil, Typhoon Jongdari, Typhoon Yagi, and**

302 **Typhoon Rumbia. The track is labeled with the date of the month and day (in month.day).**

303 **The circle, triangle, square and pentagram indicate the intensity category of tropical cyclones**

304 **is less than 1 (IC < 1), equal to 1 (IC = 1), equal to 2 (IC = 2), and not less than 3 (IC >= 3),**

305 **respectively. Black solid line and dotted line represent the 24-hour and 48-h warning line for**

306 **tropical cyclones, respectively. The colored solid points are the locations of cities in the YRD,**  
307 **and different color represents different cities categories. Wherein, red, carrot, green and**  
308 **yellow are category I, II, III and IV cities, respectively.**

309

310 To further understand the relationship between O<sub>3</sub> episodes and landfall typhoons, we mark the  
311 critical moments of landfall typhoons in Figure 3. The letter A indicates the moment ~~when at~~  
312 typhoons ~~has~~ve reached the 24-h warning line, and the letter B indicates the last moment of ~~that~~  
313 typhoon ~~remains active~~activity in the mainland China. These moments are acquired from the best-  
314 track TC dataset, depending on the start and the end time of the ~~densified-3h~~ observations.  
315 Coordinates 1, 2, 3, and 4 represent Typhoon Ampil, Typhoon Jongdari, Typhoon Yagi, and Typhoon  
316 Rumbia, respectively. As shown in Figure 3, O<sub>3</sub> exhibited a significant cycle during the study period.  
317 That is, when the typhoon is close enough (near moments A1, A2, A3 and A4), the O<sub>3</sub> concentrations  
318 decreased, but O<sub>3</sub> concentrations would increase as long as the typhoon was not active in the  
319 mainland China (B1, B2 and B4) any more. This cycle would repeat if the next typhoon approached.  
320 O<sub>3</sub> pollution was likely to occur during the period from the end of ~~at~~the typhoon to the arrival of the  
321 next typhoon (B1A2 and B2A3) in the YRD.

322 Furthermore, we find that the variations of O<sub>3</sub> was related to the track, duration and landing  
323 intensity of the typhoons. For example, during the B1A2 period when the O<sub>3</sub> pollution occurred, the  
324 moments that hourly O<sub>3</sub> concentrations first exceed 200 µg m<sup>-3</sup> in about half of cities of the  
325 categories I, II, III and IV were 6:00 UTC (14:00 LST) 27 July, 6:00 UTC (14:00 LST) 28 July, 3:00  
326 UTC (11:00 LST) 29 July and 6:00 UTC (14:00 LST) 31 July, respectively. This phenomenon also  
327 suggests that O<sub>3</sub> pollution ~~first occurs-~~ in cities along the coastline~~in coastal region will be ahead~~  
328 ~~of that in inland regions~~, which may be related to the track of typhoons (Figure 4). ~~Regarding~~As for  
329 the impact of typhoon duration, the A4B3 period provided a good interpretation. While Typhoon  
330 Yagi was still active in the mainland China, Typhoon Rumbia had reached the 24-hour warning line.  
331 Hence, the O<sub>3</sub> remained a low level throughout the period (A3B4), which was quite different from  
332 B1A2 and B2A3 period. Noted that the landing point and active path of Typhoon Ampil and  
333 Typhoon Jongdari were very similar (Figure 4). However, the landing intensity of Typhoon Ampil  
334 was severe tropical storm (IC = 3), and that of Typhoon Jongdari was tropical storm (IC = 2),  
335 resulting in a difference in O<sub>3</sub> concentrations for Shanghai. Within 24 hours after Typhoon Ampil

(Jongdari) reached the 24-hour warning line, the average O<sub>3</sub> concentrations ~~reached~~ was 40.9 (80.1) μg m<sup>-3</sup> in Shanghai. This is because that the stronger the typhoon landed, the gale (The 10-m wind speed near moment A1 was larger than that near moment A2 in Shanghai, Figure 7a) and precipitation accompanying the typhoon will be more effective in removing O<sub>3</sub>.

### 3.3 Processes of O<sub>3</sub> pollution affecting by typhoons

To reveal the major processes of O<sub>3</sub> pollution episodes affected by landfall typhoons, ~~four~~ representative cities (Shanghai, Hangzhou, Nanjing and Hefei) one municipality and three provincial capital cities with different longitudes, including Shanghai (121.77°E, 31.12°N), Hangzhou (120.17°E, 30.23°N), Nanjing (118.80°E, 32.00°N) and Hefei (117.23°E, 31.87°N), are selected for further analysis – based on monitoring data and model results.

#### 3.3.1 Evaluation of model performance

To evaluate the simulation performance, the hourly simulation results are compared with the measurements ~~from~~ during 00:00 16 July to 00:00 25 August. Table 3 presents the statistical metrics for selected variables, including temperature at 2 m (T<sub>2</sub>), relative humidity (RH), wind speed at 10 m (WS<sub>10</sub>), ~~and~~ wind direction at 10 m (WD<sub>10</sub>), and surface O<sub>3</sub>. T<sub>2</sub> is reasonably well simulated, with R values of 0.75, 0.77, 0.72 and 0.64 in Shanghai, Hangzhou, Nanjing and Hefei, respectively. Though our simulation underestimates T<sub>2</sub> to some ~~certain~~ extent, this ~~slightly~~ underestimation is acceptable because of ~~due to~~ the small RMSE (3.2, 2.7, 2.9 and 3.3) and NMB (-7.5%, -5.1%, -5.5% and -5.5%) values. As for RH, the simulation results are overestimated in all four cities, leading to the NMB values of 9.1%, 4.6%, 6.7% and 0.5% in Shanghai, Hangzhou, Nanjing and Hefei, respectively. With high R values (0.69, 0.65, 0.71 and 0.71) and relatively low RMSE values (12.4, 12.8, 12.1 and 10.8), the WRF simulates RH over the YRD quite well. The wind fields are closely related to the transport processes of air pollutants. The overestimation of WS<sub>10</sub> may partly be attributed to the unresolved terrain features by the default surface drag parameterization causing overestimation of wind speed in particular at low values (Jimenez and Dudhia, 2012; Li et al., 2017). With regards to WD<sub>10</sub>, the simulation error is large based only on these statistical metrics. This is because that near-surface wind fields are deeply influenced by local underlying surface characteristics, and improving the urban canopy parameters might be useful (Liao et al., 2015; Xie et al., 2016). In term of O<sub>3</sub>, the simulation results for ~~simulation results for~~ O<sub>3</sub> concentrations behave satisfactorily. R ~~is as high as~~ 0.55, 0.65, 0.66 and 0.54 for the simulations for ~~in~~ Shanghai, Hangzhou, Nanjing and

366 Hefei, respectively, while the NMB values are 5.8%, 16.4%, -6.2% and -5.3%, respectively.

367

368 **Table 3. Statistical metrics ~~infor~~ meteorological variables and O<sub>3</sub> concentration between the**  
369 **observations and simulation~~se~~chemical-variables.**

| City     | Variable                              | $\bar{O}$ | $\bar{S}$ | R     | RMSE  | NMB    |
|----------|---------------------------------------|-----------|-----------|-------|-------|--------|
| Shanghai | T <sub>2</sub> (°C)                   | 30.3      | 28.1      | 0.75  | 3.2   | -7.5%  |
|          | RH (%)                                | 75.0      | 81.8      | 0.69  | 12.4  | 9.1%   |
|          | WS <sub>10</sub> (m s <sup>-1</sup> ) | 4.9       | 5.5       | 0.51  | 2.3   | 11.7%  |
|          | WD <sub>10</sub> (°)                  | 144.8     | 113.4     | 0.01  | 113.5 | -22.9% |
|          | O <sub>3</sub> (μg m <sup>-3</sup> )  | 74.3      | 76.5      | 0.55  | 45.3  | 5.8%   |
| Hangzhou | T <sub>2</sub> (°C)                   | 30.3      | 28.8      | 0.77  | 2.7   | -5.1%  |
|          | RH (%)                                | 75.1      | 78.5      | 0.65  | 12.8  | 4.6%   |
|          | WS <sub>10</sub> (m s <sup>-1</sup> ) | 3.3       | 4.7       | 0.32  | 2.7   | 32.5%  |
|          | WD <sub>10</sub> (°)                  | 155.0     | 114.7     | -0.10 | 132.5 | -27.8% |
|          | O <sub>3</sub> (μg m <sup>-3</sup> )  | 81.7      | 91.3      | 0.65  | 49.8  | 16.4%  |
| Nanjing  | T <sub>2</sub> (°C)                   | 29.8      | 28.1      | 0.72  | 2.9   | -5.5%  |
|          | RH (%)                                | 77.4      | 82.6      | 0.71  | 12.1  | 6.7%   |
|          | WS <sub>10</sub> (m s <sup>-1</sup> ) | 3.1       | 5.0       | 0.39  | 3.0   | 63.8%  |
|          | WD <sub>10</sub> (°)                  | 132.8     | 115.6     | 0.21  | 102.7 | -15.0% |
|          | O <sub>3</sub> (μg m <sup>-3</sup> )  | 87.6      | 79.8      | 0.66  | 46.7  | -6.2%  |
| Hefei    | T <sub>2</sub> (°C)                   | 29.3      | 27.7      | 0.64  | 3.3   | -5.5%  |
|          | RH (%)                                | 81.1      | 81.5      | 0.71  | 10.8  | 0.5%   |
|          | WS <sub>10</sub> (m s <sup>-1</sup> ) | 3.2       | 3.2       | 0.37  | 2.2   | 2.9%   |
|          | WD <sub>10</sub> (°)                  | 147.0     | 128.6     | 0.04  | 136.7 | -13.3% |
|          | O <sub>3</sub> (μg m <sup>-3</sup> )  | 87.3      | 80.3      | 0.54  | 45.0  | -5.3%  |

370 *Note.* R exceeds 0.1 to reach statistically significant at 99.9% confident level.  $\bar{O}$  and  $\bar{S}$  are the  
371 average values of the observations and simulations, respectively.

372

373 Figure 5 further shows hourly variations of O<sub>3</sub>, T<sub>2</sub>, WS<sub>10</sub> and WD<sub>10</sub> for measurements and  
374 simulations in four representative cities. The simulations effectively reproduce the diurnal variation  
375 of O<sub>3</sub>, T<sub>2</sub> and WS<sub>10</sub>, confirming the reliability of the simulation results. Moreover, the model well  
376 captures the shift in wind direction during the study period. Thus, the overall model performance in  
377 simulating~~for~~ wind fields is acceptable. In summary, the simulations results can capture and  
378 reproduce the major meteorological characteristics and O<sub>3</sub> evolution during of the O<sub>3</sub> episodes, and  
379 thus including the meteorological conditions and evolution of O<sub>3</sub>, which can provide valuable

380 insights into the formation of the O<sub>3</sub> episodes.

381

382

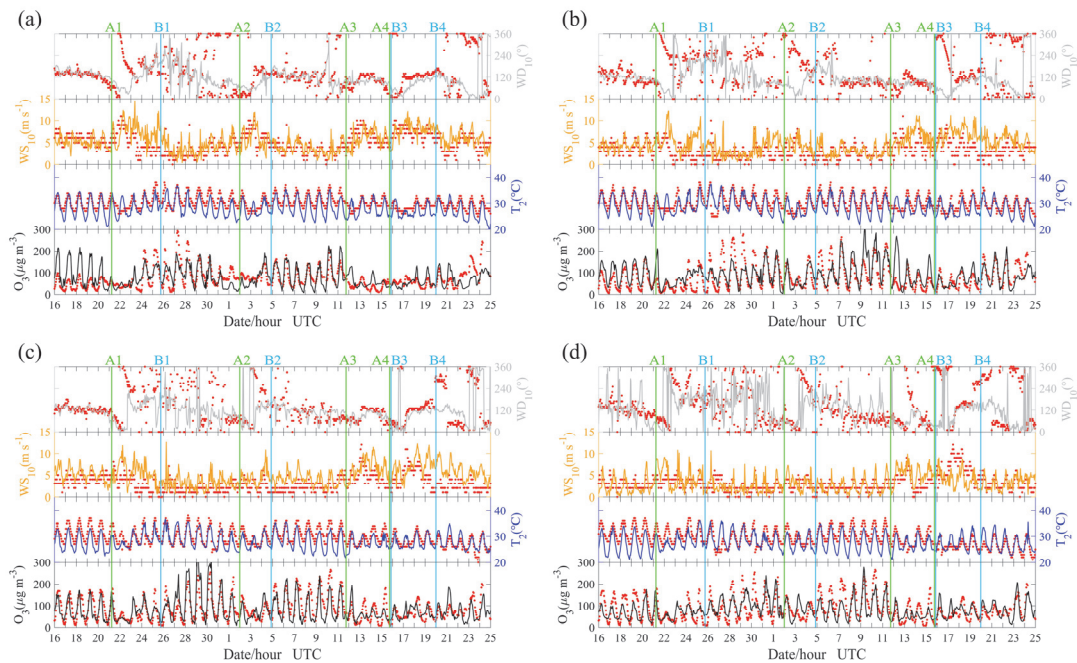

383

384 **Figure 5. Hourly variations of O<sub>3</sub>, T<sub>2</sub>, WS<sub>10</sub> and WD<sub>10</sub> infor measurements (red dots) and**  
385 **simulation (colored lines) in (a) Shanghai, (b) Hangzhou, (c) Nanjing and (d) Hefei.**

386

### 387 3.3.2 Shanghai in category I cities

388 In theis study period, Shanghai was usually one of the first cities affected by landfall typhoons.

389 We can see a multiday episode of O<sub>3</sub> during the period of 24-28 July, with a maximum of hourly O<sub>3</sub>

390 up to 292 μg m<sup>-3</sup> at 27 July (Figure 6a). The high O<sub>3</sub> concentrations together with high primary

391 pollutants (CO and NO<sub>2</sub>) suggest a strong photochemical O<sub>3</sub> production under the condition of high

392 temperature (The daily maximum temperature can reach 35 °C) during this period, and the weak

393 wind may play a significant role in the accumulation of surface O<sub>3</sub>. The increase of the primary

394 pollutants may be related to the wind shifta change in wind direction from southeast to southwest

395 causing by Typhoon Ampil (A1 in Figure 6a, -A1 and A1B1 in Figure 7), resulting in air masses

396 originally from the ocean had become inlandwhich originally brought airmass from the ocean,

397 shifted to from inland. Interestingly, PM<sub>2.5</sub> also showed good correlation with O<sub>3</sub> and primary

398 pollutants, especially for NO<sub>2</sub> during this period. This indicates that a high level of oxidizability can

399 promote the formation of secondary particles (Kamens et al., 1999; Khoder, 2002). From the results

400 of process analysis (Figure 6b), the major contributions to surface O<sub>3</sub> were TDIF, CHEM and DDEP

401 due to the small net contribution of MADV. TDIF had a considerable positive contribution while  
402 DDEP did the opposite, suggesting that high surface O<sub>3</sub> may be sourced from the upper layer via  
403 TDIF process, and be removed via DDEP process. However, for the whole boundary layer, which  
404 is defined as the layer less than 1500 m in this study, ~~it was~~ the balance was between CHEM and  
405 DDEP instead TDIF and DDEP. Thus, TDIF was likely to play the role of “transport” from the upper  
406 layer to surface. Figure 6c further shows the temporal-vertical distribution of O<sub>3</sub> with vertical wind  
407 velocity. The downward airflows ~~were~~ prevailed over Shanghai until 23 July, which are induced by  
408 the subtropical high. Then, strong upward airflows appeared as Typhoon Ampil arrived, and high  
409 level of O<sub>3</sub> disappeared. Around 27 July, the downward airflows gradually resumed and high level  
410 of O<sub>3</sub> occurred. The downward airflows are critical because they can not only inhibit the vertical  
411 transport of O<sub>3</sub> but also transport high-level O<sub>3</sub> to the surface. The high-level O<sub>3</sub> in the troposphere  
412 mainly comes from two sources. One is that O<sub>3</sub>-rich air from the low stratosphere transported by  
413 the downdrafts in large-scale typhoon circulation (Jiang et al., 2015). The other is that O<sub>3</sub> produced  
414 by photochemical reactions during the day. It is note-worthy that ~~the high value center of O<sub>3</sub>~~  
415 ~~appeared near the altitude of 1 km instead of near surface, indicting~~ high photochemical production  
416 efficiency of O<sub>3</sub> occurred in the middle boundary layer instead of at the surface. Moreover, most of  
417 the O<sub>3</sub> remained in the residual layer at night, while surface O<sub>3</sub> concentration was much lower due  
418 to NO<sub>x</sub> titration. By the second day, high O<sub>3</sub> in the residual layer was transported to the surface by  
419 the downward airflows as air in the boundary layer is gradually mixed. Combined with the newly  
420 generated O<sub>3</sub>, a high concentration of O<sub>3</sub> would eventually appear on the surface. ~~The downward~~  
421 ~~airflows can not only inhibit the vertical transport of O<sub>3</sub> but also transport high-level O<sub>3</sub> to the~~  
422 ~~surface, causing the episodes of surface O<sub>3</sub>.~~

423 As shown in Figure 7, O<sub>3</sub> pollution tends to occur during the period from the end of ~~the~~  
424 typhoon to the arrival of the next typhoon (B1A2 and B2A3) in the YRD. To reveal this phenomenon,  
425 we compare these two periods (B1A2 and B2A3) with their previous periods (A1B1 and A2B2)  
426 using the skew-T log-P diagram (Figure 6d and 6e). It is found that the atmospheric conditions of  
427 B1A2 (B2A3) were hotter and drier than A1B1 (A2B2) below 700 hPa in Shanghai, and wind speed  
428 is smaller in B1A2 (B2A3). Those changes in atmospheric conditions after typhoon will be  
429 conducive to the generation of high O<sub>3</sub> concentration in Shanghai.

430

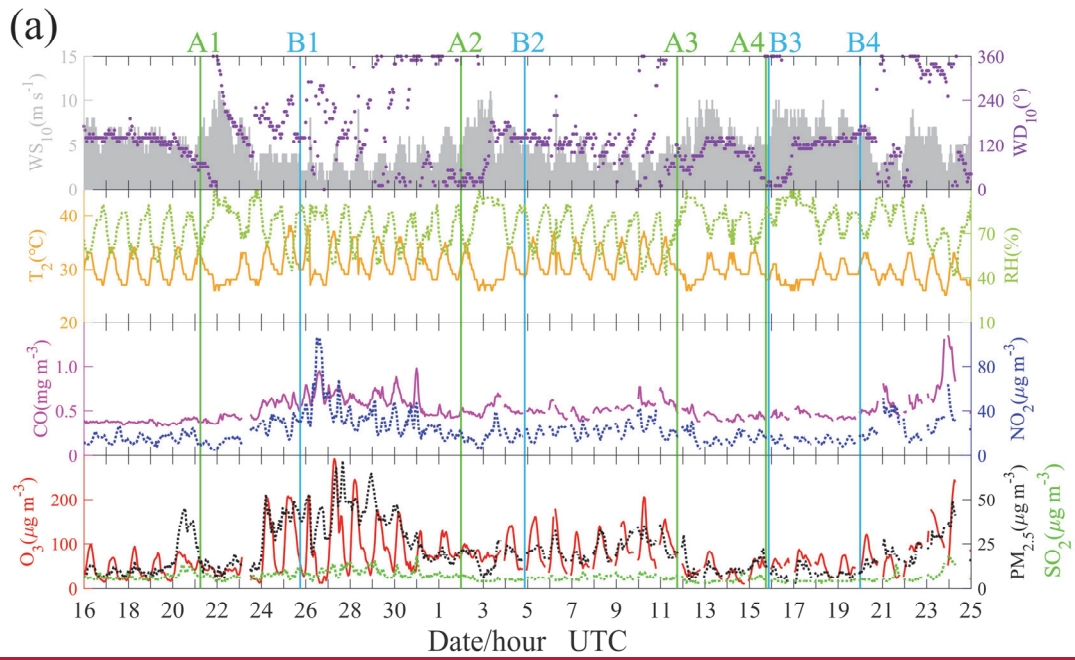

431

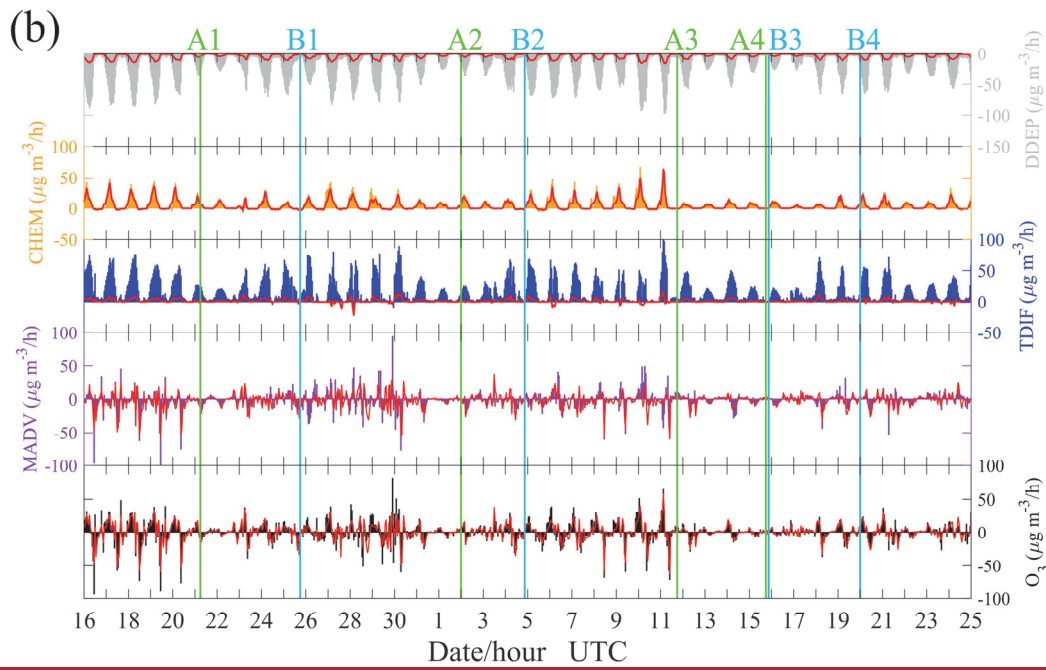

432

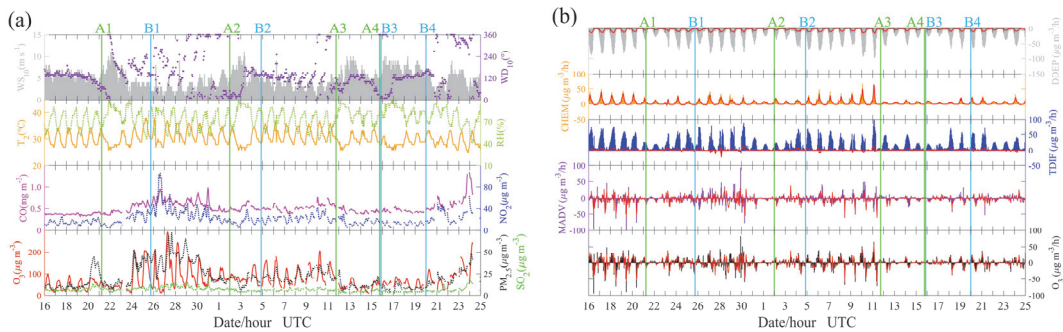

433



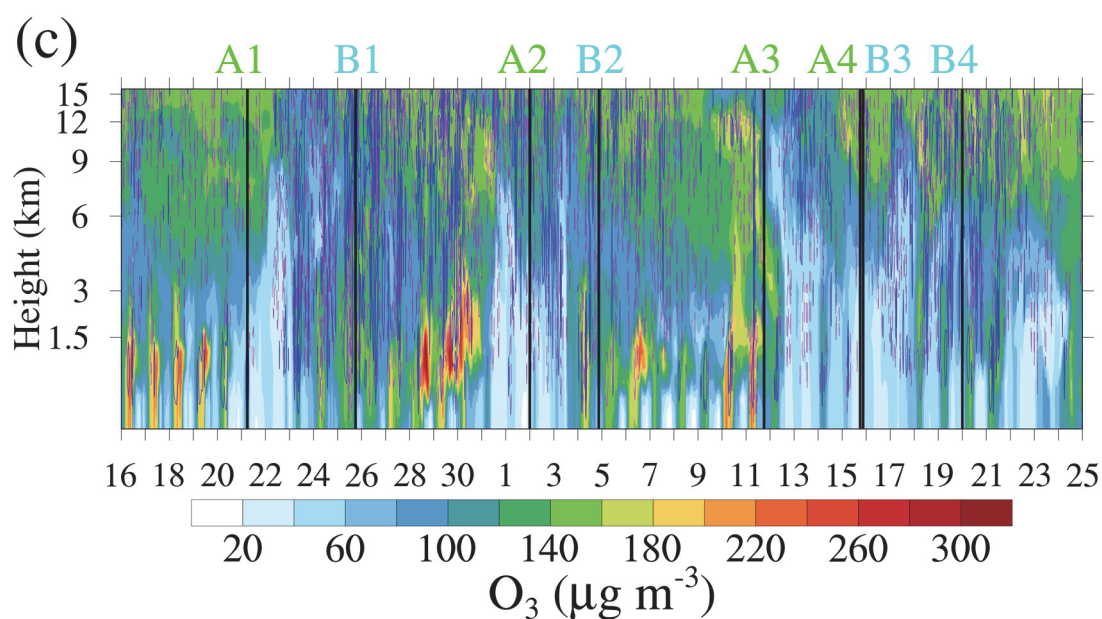

434

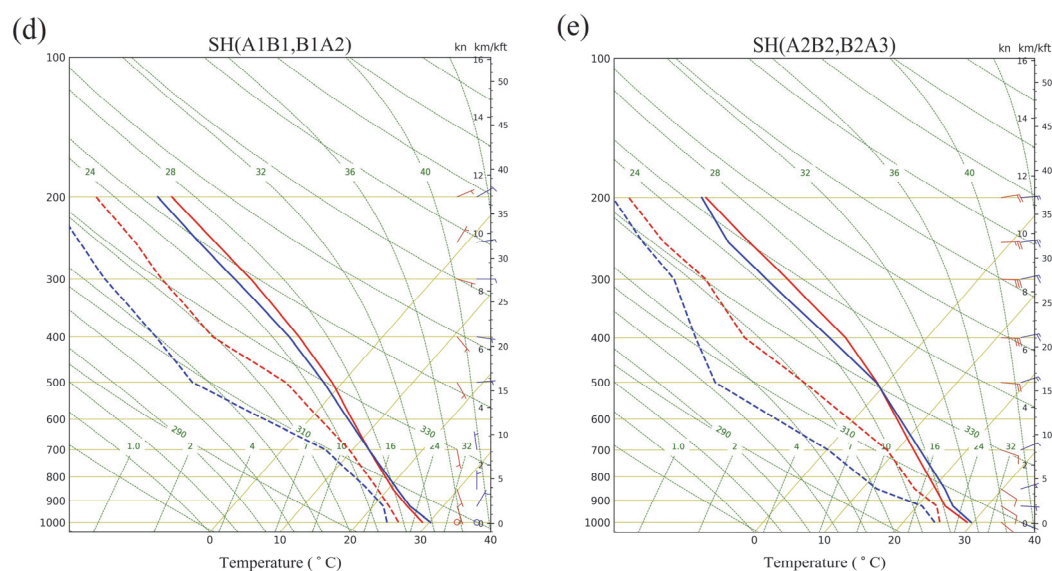

435

436 **Figure 6. (a) Time series of air pollutants ( $O_3$ ,  $PM_{2.5}$ ,  $SO_2$ ,  $CO$  and  $NO_2$ ) and meteorological**  
 437 **factors ( $T_2$ ,  $RH$ ,  $WS_{10}$  and  $WD_{10}$ ) in Shanghai. (b) Individual processes contribution to net  $O_3$**   
 438 **density at Shanghai.  $O_3$  is the net increase, MADV is the sum of horizontal advection (HADV)**  
 439 **and vertical advection (ZADV), TDIF is the sum of horizontal diffusion (HDIF) and vertical**  
 440 **diffusion (VDIF), CHEM is the chemical reaction process, and DDEP is the dry deposition**  
 441 **process. The color histograms indicate the results for the layer near the surface, while the solid**  
 442 **red lines indicate the average results for all layers below 1500 m. (c) Temporal-vertical**  
 443 **distribution of  $O_3$  with vertical wind velocity over Shanghai. The dotted purple line and solid**  
 444 **blue line indicate the negative wind speeds (downward airflows) and positive wind speeds**

445 (upward airflows), respectively. (d) The skew-T log-P diagram at Shanghai. The average  
 446 results of period A1B1 and B1A2 are shown in red and blue, respectively. (e) Same as (d), but  
 447 for the average results of period A2B2 and B2A3.  
 448

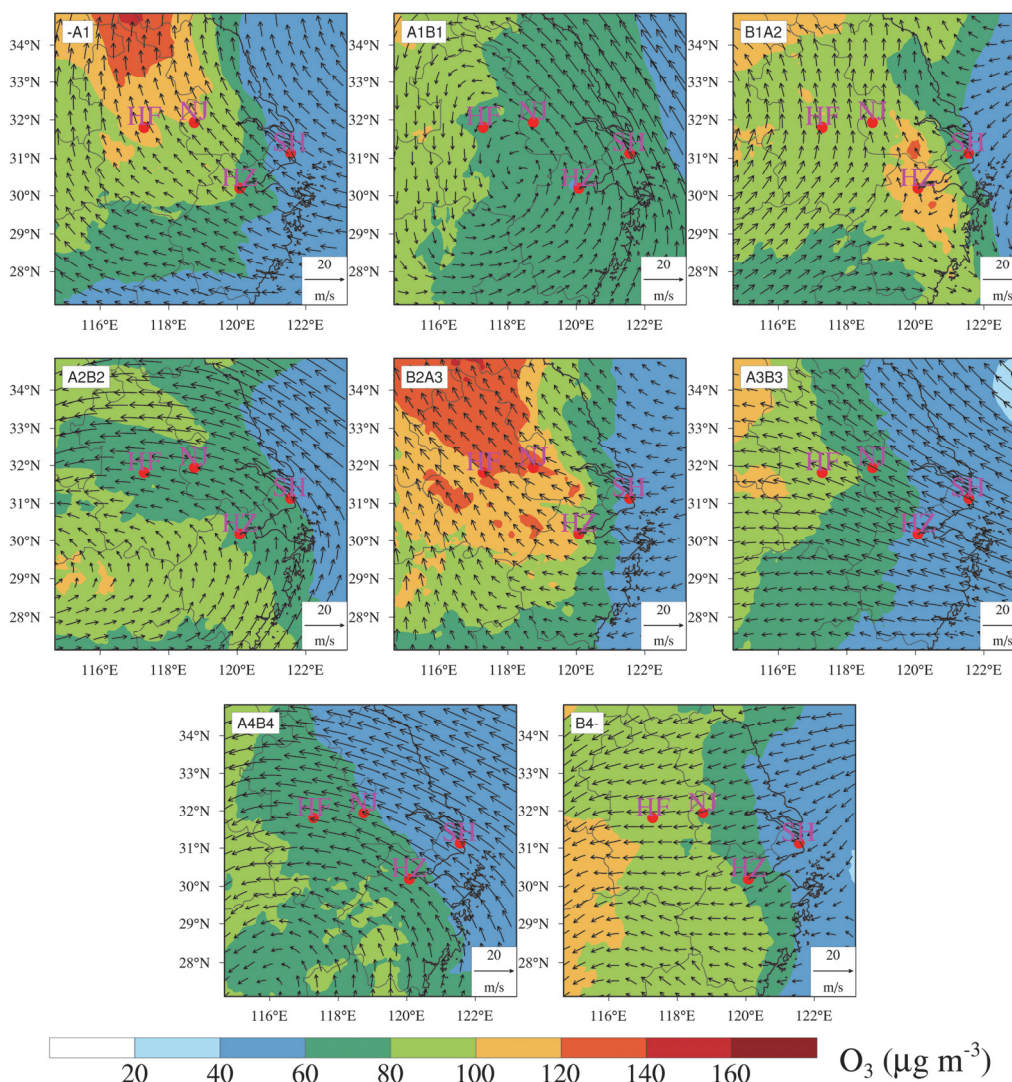

449  
 450 **Figure 7. Spatial distribution of surface O<sub>3</sub> overlaid with wind fields at 850 hPa over the YRD.**  
 451 **-A1, A1B1, B1A2, A2B2, B2A3, A3B3, A4B4, B4-** are the average results from the beginning  
 452 **to A1, A1 to B1, B1 to A2, A2 to B2, B2 to A3, A3 to B3, A4 to B4, and B4 to the end, respectively.**  
 453 **Details can be found in Figure 4.**

454  
 455 **3.3.3 Hangzhou in category II cities**

456 Figure 8 presents the ~~case inresults for~~ Hangzhou. It shows that high O<sub>3</sub> concentrations  
 457 occurred on 27-31 July and 5-7 August, which may also be related to the strong photochemical

458 production of O<sub>3</sub> under the abundance of precursors (Figure 8a) and poor diffusion conditions due  
 459 to the light wind (B1A2 and B2A3 in Figure 7). Figure 8a further shows that high O<sub>3</sub> was often  
 460 associated with an increase in CO but the NO<sub>2</sub> concentrations usually remained at the same level.  
 461 This phenomenon indicates a VOCs-limited regime in this city since CO usually have good  
 462 correlation with VOCs and can play a similar role as VOCs in the photochemical production of O<sub>3</sub>  
 463 (Atkinson, 2000; Ding et al., 2013). In fact, O<sub>3</sub> in other representative cities (Shanghai, Nanjing and  
 464 Hefei) also showed a better correlation with CO than NO<sub>2</sub>. Though Hangzhou is close to Shanghai,  
 465 there is a significant difference of wind fields over these two cities. Starting from the arrival of  
 466 Typhoon Ampil (A1). The wind direction in Hangzhou did not change back to southeast until a few  
 467 days later after Typhoon Jongdari dissipated (B2). During this period (A1B2), the frequent  
 468 southwest wind may be the reason for high CO concentrations in Hangzhou. In addition, the chaotic  
 469 wind field during period B1A2 (B1A2 in Figure 7) may lead to the light wind in Hangzhou. With  
 470 respect to the simulation results, the model simulated the variation of O<sub>3</sub> but failed to capture the O<sub>3</sub>  
 471 peaks (e.g., the peak values on 27-31 July), which may be related to the strong upward airflows  
 472 (Figure 8c) that inhibited the accumulation of O<sub>3</sub> (Figure 8b). This further illustrates that downward  
 473 airflows may be an important factor for O<sub>3</sub> episodes in this case.

474

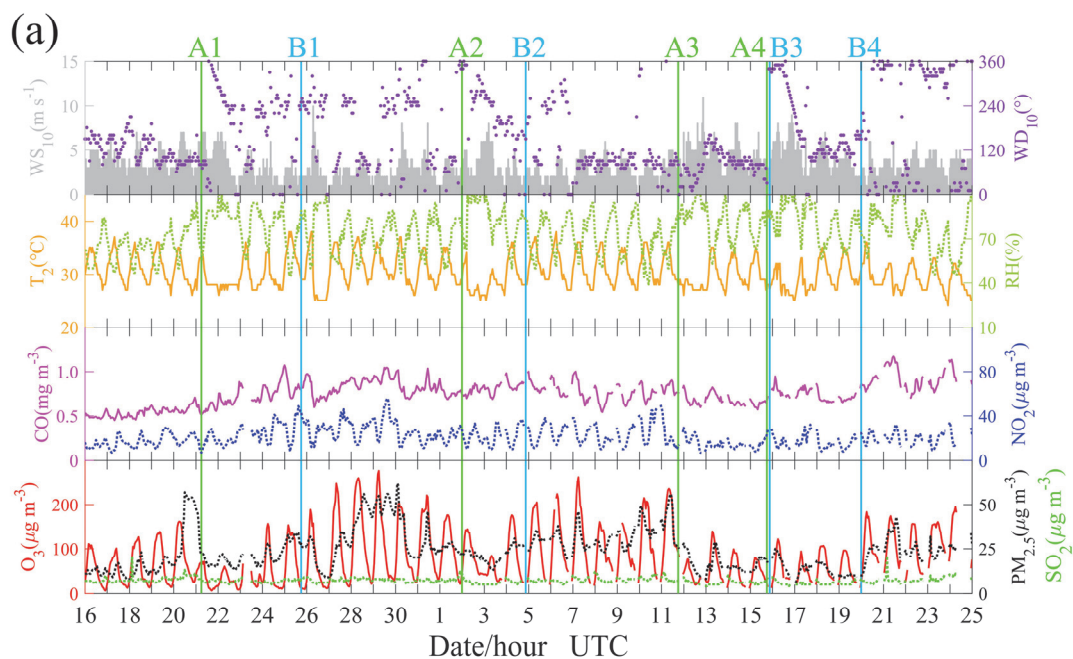

475

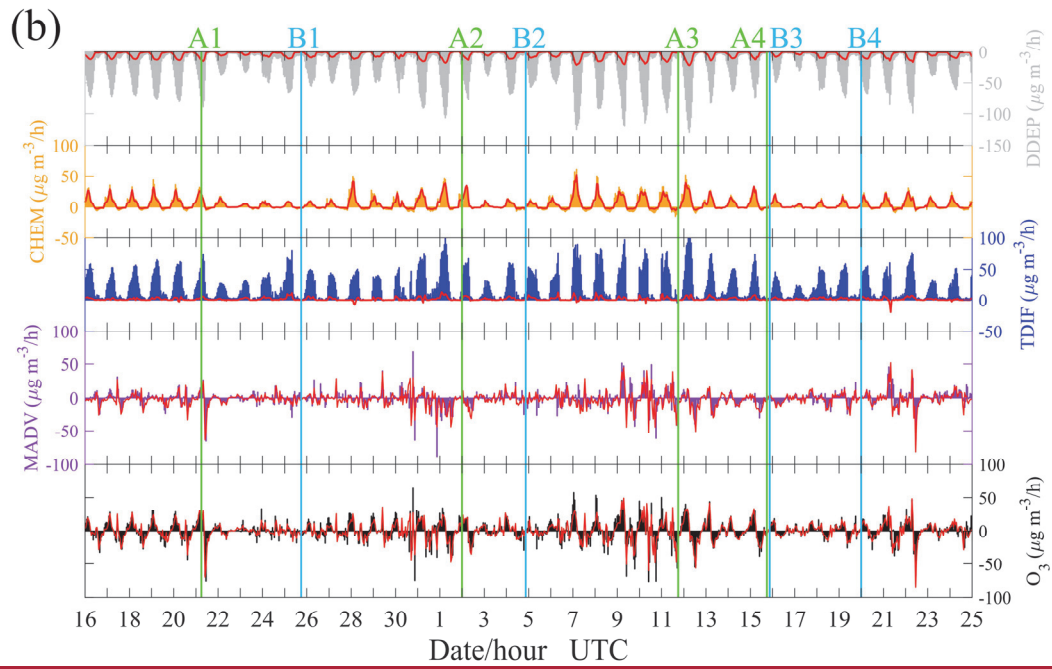

476

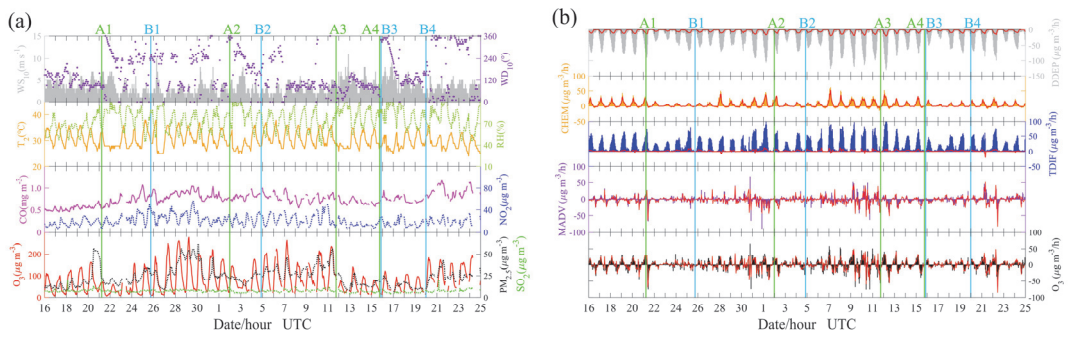

477

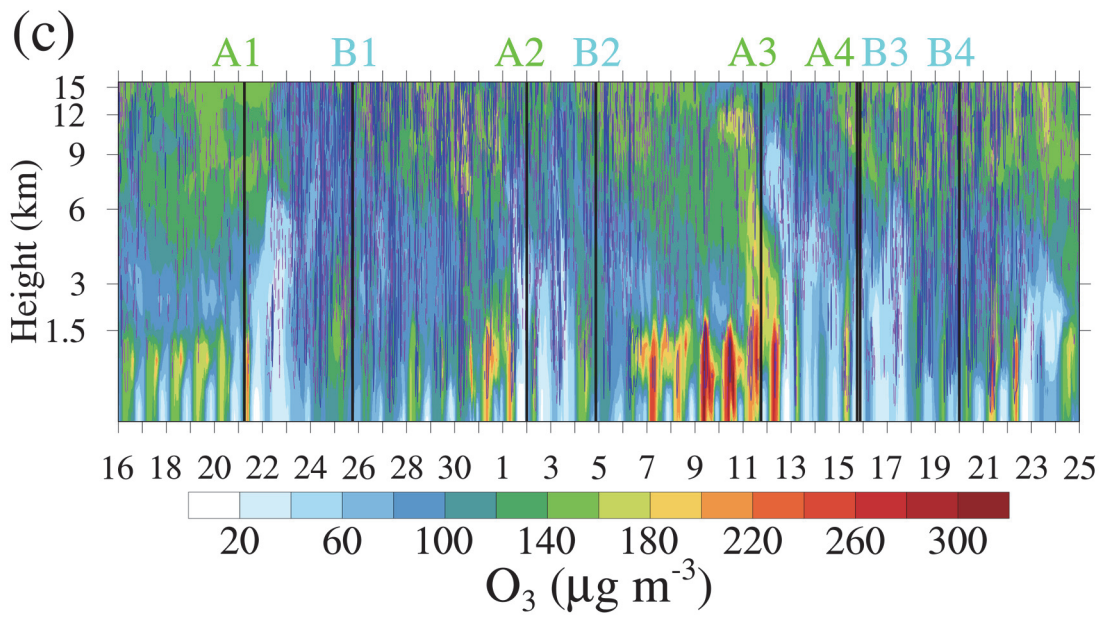

478

479

Figure 8. Same as Figure 6 (a)-(c), but for Hangzhou.

480

### 481 3.3.4 Nanjing in category III cities

482 ~~In~~As for Nanjing, the O<sub>3</sub> episodes ~~with~~ exceeded ~~the~~ ~~anee~~ ~~of~~ national air quality standards  
483 ~~was~~ere observed on 28 July to 1 August and 7-11 August. These O<sub>3</sub> episodes were characterized by  
484 abundant O<sub>3</sub> precursors under the condition of high temperature. Furthermore, light wind (B1A2  
485 and B2A3 in Figure 7) and downward airflows (Figure 9c) also contributed greatly to the occurrence  
486 of O<sub>3</sub> pollution, ~~resulting from a mechanism similar to~~~~with the similar mechanism as~~ that ~~for~~  
487 Shanghai and Hangzhou. As early as on 22 July, the wind direction in Nanjing ~~had~~ changed from  
488 southeast to southwest ~~because of the arrival of~~~~affected by~~ Typhoon Ampil, and thus the  
489 concentrations of the main primary pollutants (CO, NO<sub>2</sub> and SO<sub>2</sub>) increased (Figure 9a). However,  
490 high-level O<sub>3</sub> episodes did not occur until 28 July even though the maximum temperature did not  
491 change significantly during 24-31 July. The “obstacle” ~~for enhancing O<sub>3</sub> level~~~~of the O<sub>3</sub> episodes~~  
492 may be the precipitation ~~caused~~~~ing~~ by the strong upward airflows during 23-26 July (Figure 9c). As  
493 shown in Figure 9b, high surface O<sub>3</sub> concentration during the pollution episodes is the result of  
494 TDIF and CHEM processes, and is lost through DDEP and MADV processes. ~~Regarding~~~~With~~  
495 ~~respect to the~~ vertical structure of atmospheric, B1A2 (B2A3) was also hotter and drier than A1B1  
496 (A2B2) below 700 hPa in Nanjing (Figure 9d and 9e). ~~These consequences, similar to those in~~~~The~~  
497 ~~similar results as~~ Shanghai, further confirm that high O<sub>3</sub> concentrations in a region are more likely  
498 to occur during the period from the end of ~~an exciting~~~~the~~ typhoon to the arrival of the next typhoon  
499 (B1A2 and B2A3) than during the period when ~~at~~the typhoon approaches and is active in the  
500 ~~region~~~~mainland China~~ (A1B1 and A2B2).

501

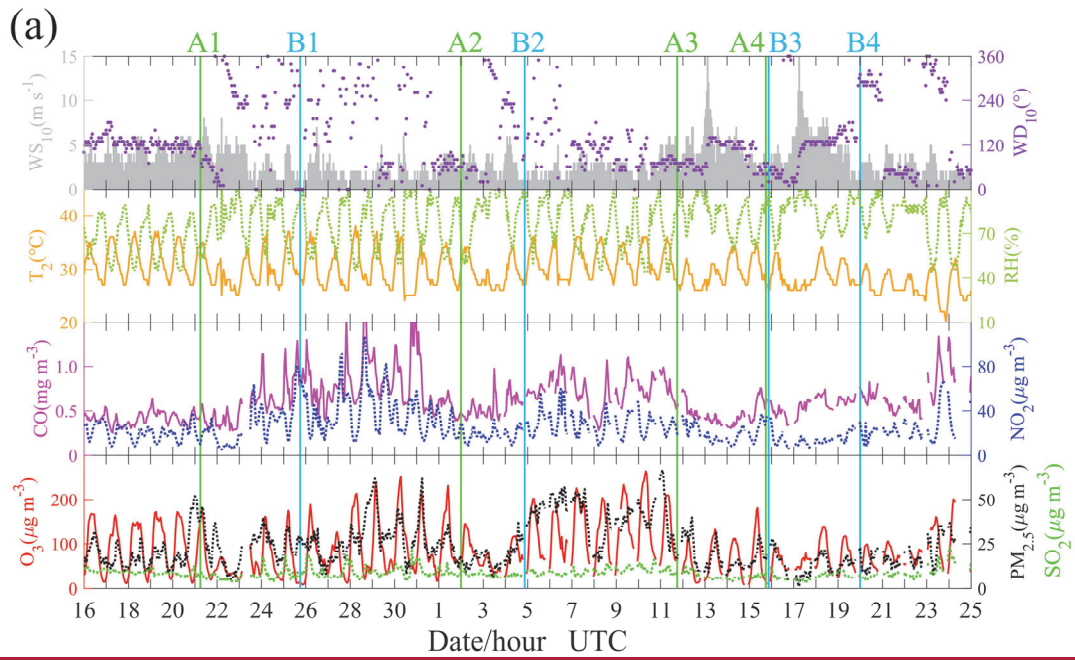

502

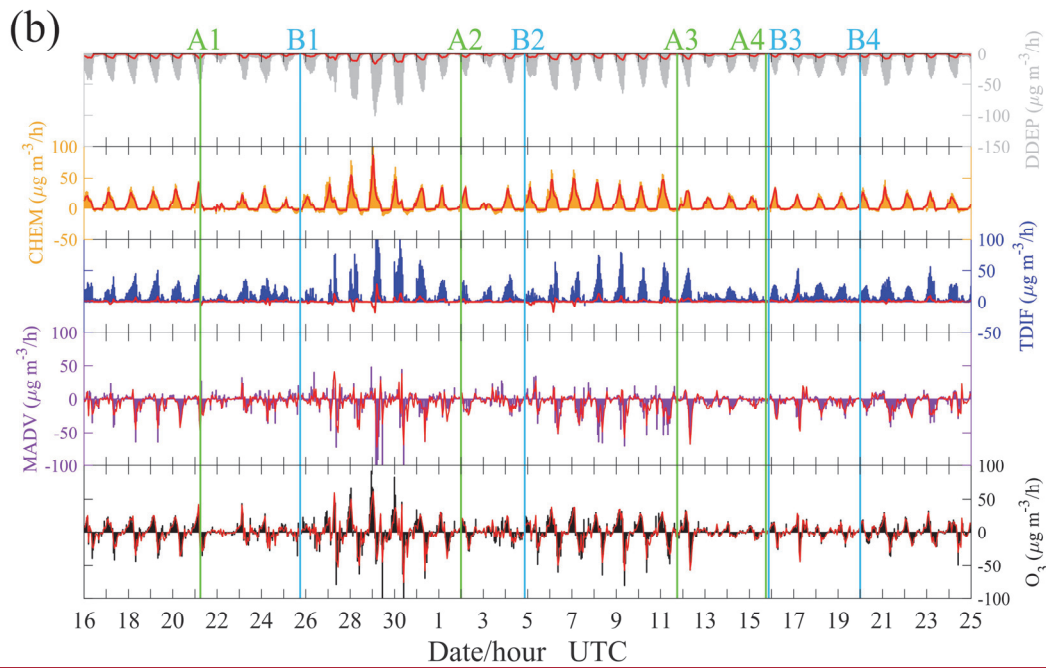

503

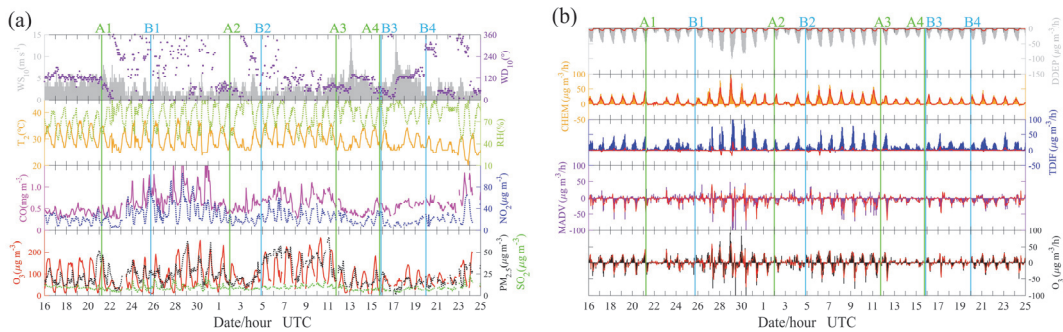

504

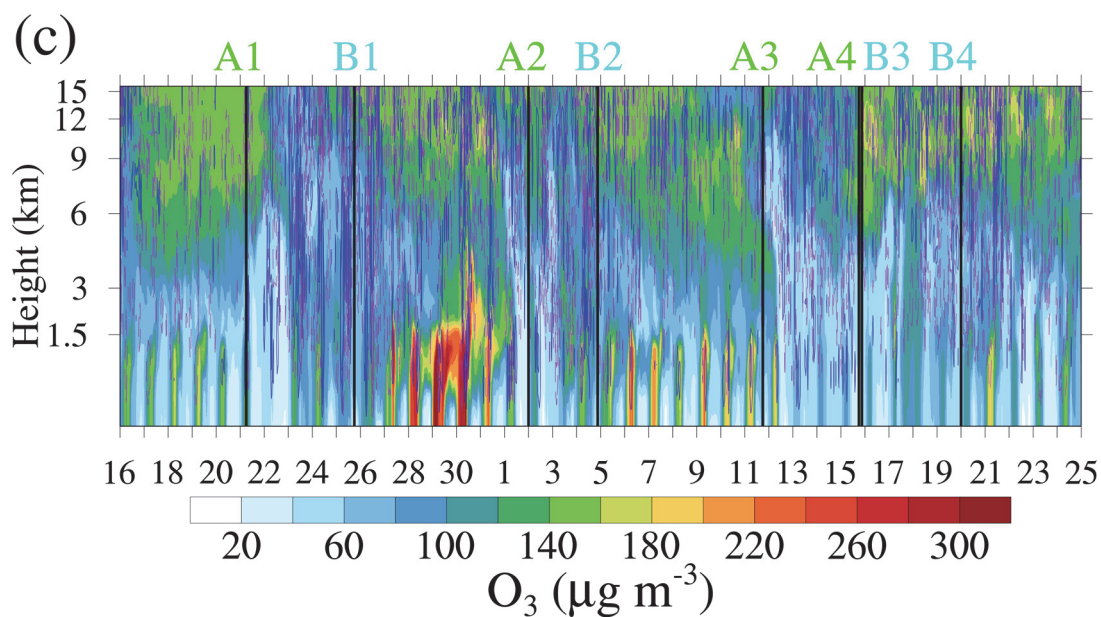

505

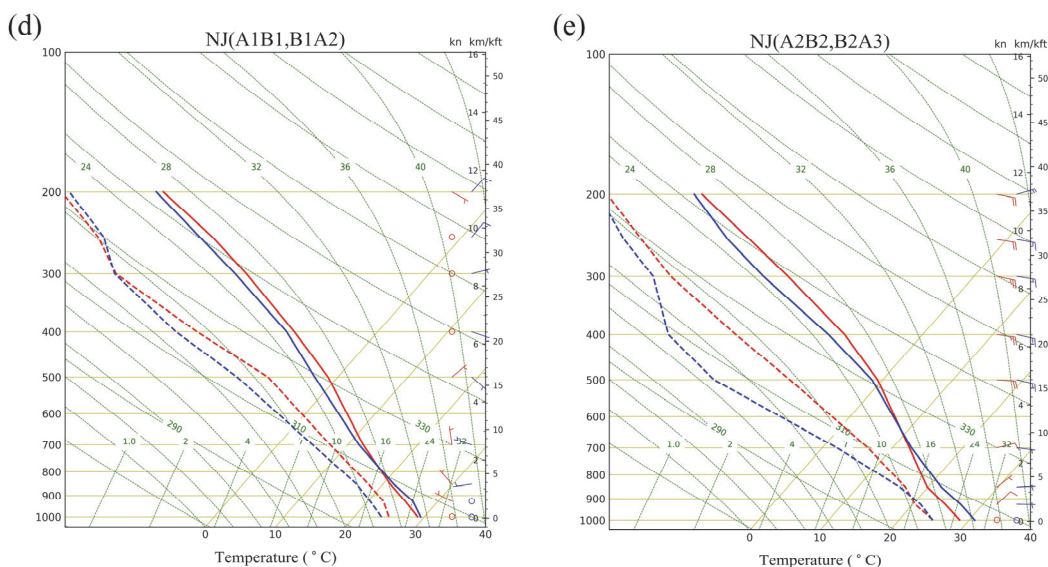

506

507 **Figure 9. Same as Figure 6, but for Nanjing.**

508

### 509 3.3.5 Hefei in category IV cities

510 Hefei is the city farthest from the coast among the four representative cities, and O<sub>3</sub> pollution  
 511 occurred on 31 July and 8-11 August. We ~~can~~ also find the phenomenon that the precursors  
 512 concentrations had an increase once the wind direction changed from southeast to southwest (Figure  
 513 10a). During B1A2 and B2A3, the concentrations of the main precursors of O<sub>3</sub> washed a high level.  
 514 However, high O<sub>3</sub> concentration was mainly found in B2A3, and not in B1A2. This may be related  
 515 to the relatively low temperature during B1A2 (Figure 10a), which is not conducive to

516 photochemical production of O<sub>3</sub> (Figure 10b). As shown in Figure 10c, there were distinct upward  
 517 airflows within the boundary layer, which may be related to urban effect (e.g., urban heat islands).  
 518 These upward airflows within the boundary layer help mix the air, resulting in a uniform distribution  
 519 of O<sub>3</sub> in the vertical direction. However, the downward airflows can still inhibit the vertical diffusion  
 520 of O<sub>3</sub>, and O<sub>3</sub> tends to be trapped within the boundary layer.

521

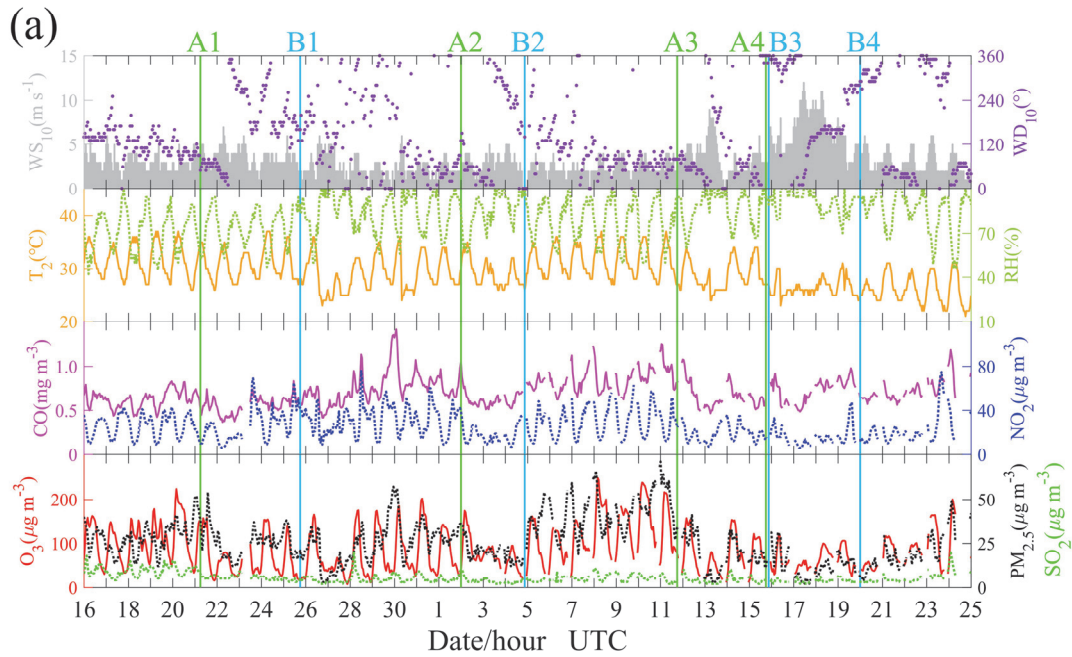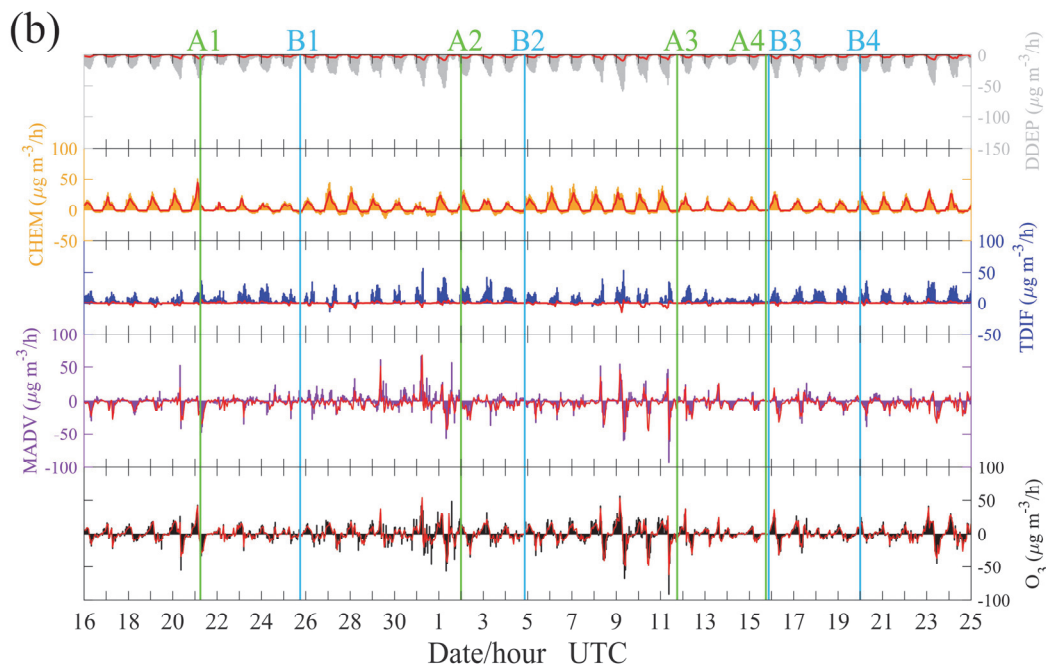



524

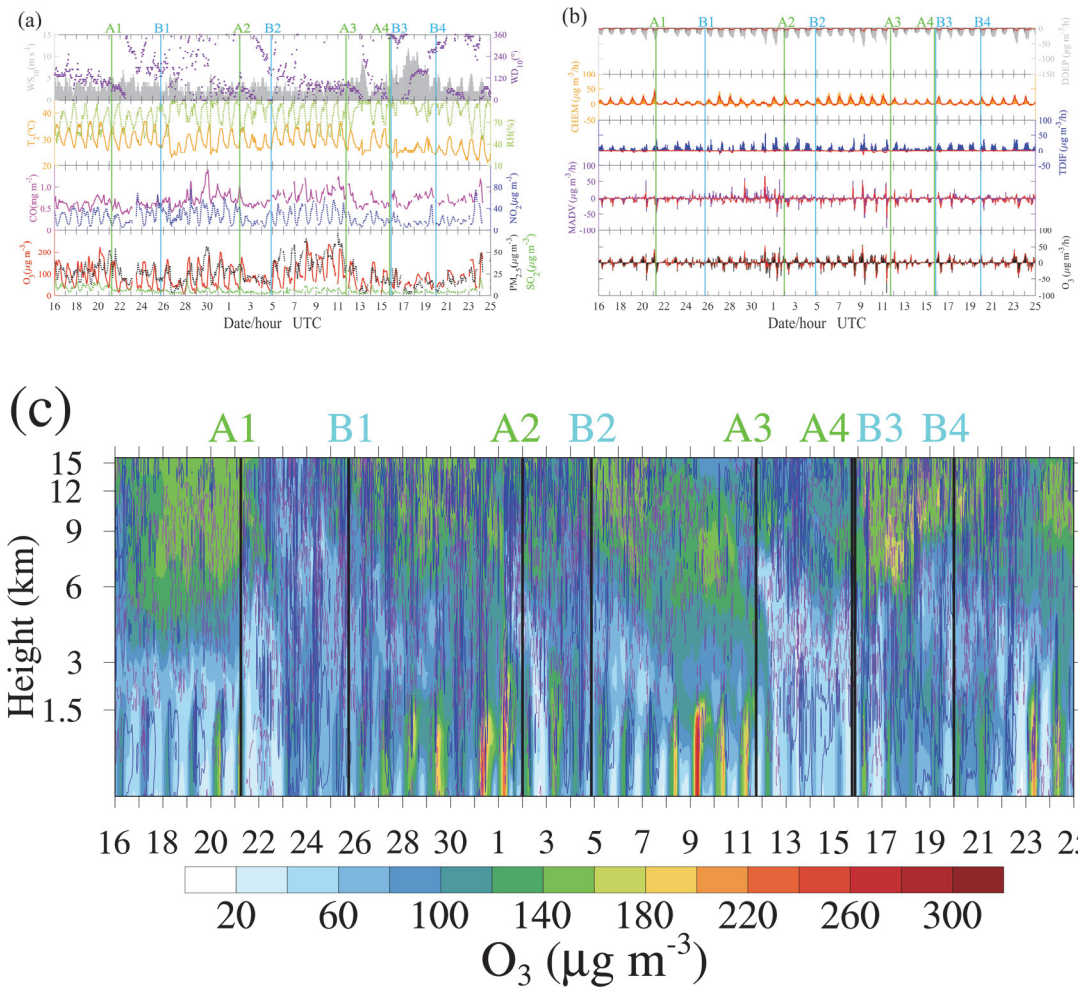

525

526 **Figure 10.** Same as Figure 6 (a)-(c), but for Hefei.

527

### 528 3.3.6 A schematic diagram of major processes

529 Although the processes of landfall typhoon affecting O<sub>3</sub> varied from city to city, the major  
 530 processes have many similarities and can be summarized as a schematic diagram in Figure 11. The  
 531 YRD region, as a typical region of East Asian monsoon climate, is strongly influenced by typhoon  
 532 activities over the Western Pacific ~~The YRD region, which features a typical subtropical monsoon~~  
 533 ~~climate, is strongly influenced by the western Pacific subtropical high in summer. Dominated by the~~  
 534 ~~subtropical high~~ In summer, the meteorological conditions of high temperature and downward  
 535 airflows combined with high levels of precursors due to the huge energy consumption ~~tend to form~~  
 536 ~~high O<sub>3</sub> concentrations in this region~~ are all favorable to O<sub>3</sub> accumulation in the region. However,  
 537 powerful systems like typhoon can break this state. For typhoons that may land in the YRD, by the  
 538 time they approach the 24-hour warning line, the prevailing southeast wind in the YRD will change

539 to southwest wind, which can transport lots of precursors from inland to the YRD. The change in  
 540 wind direction depends on the track of the typhoon and the geographical location of cities, and often  
 541 appears first in cities along the coastline~~eastal~~ region. With influence of a typhoon, the low  
 542 temperature, precipitation (upward airflows) and wild wind ~~will~~ prevent high O<sub>3</sub> and PM<sub>2.5</sub> episodes  
 543 from forming. Moreover, the effect of removing pollutants is related to the intensity of typhoon  
 544 landing, but some of the main precursors of O<sub>3</sub> are still at a high level due to foreign sources  
 545 superposed with local emissions. After the passing of typhoons, the atmosphere returns to a warm  
 546 and dry state (even more so than before), and the downward airflows resumed. The troposphere is  
 547 then flooded with high O<sub>3</sub> due to two main sources. One is that O<sub>3</sub>-rich air transported from the low  
 548 stratosphere by the downward airflows, and the other is that O<sub>3</sub> produced by strong photochemical  
 549 reactions begin to produce O<sub>3</sub> under the abundance of precursors. O<sub>3</sub> is mainly generated inside the  
 550 boundary layer (~1000 m) instead of at the surface. The high-level O<sub>3</sub> can remain in the residual  
 551 layer at night, and be then transported to the surface by downward airflows or turbulent mixing by  
 552 the second day. At the same time, the wind readjusts to southeast and wind speed is light, resulting  
 553 in poor diffusion conditions. The downward airflows and light wind obstruct the vertical and  
 554 horizontal diffusion of O<sub>3</sub>, leaving O<sub>3</sub> trapped on the ground. The thermal-dynamic effects result in  
 555 high-level surface O<sub>3</sub> in the YRD.

556

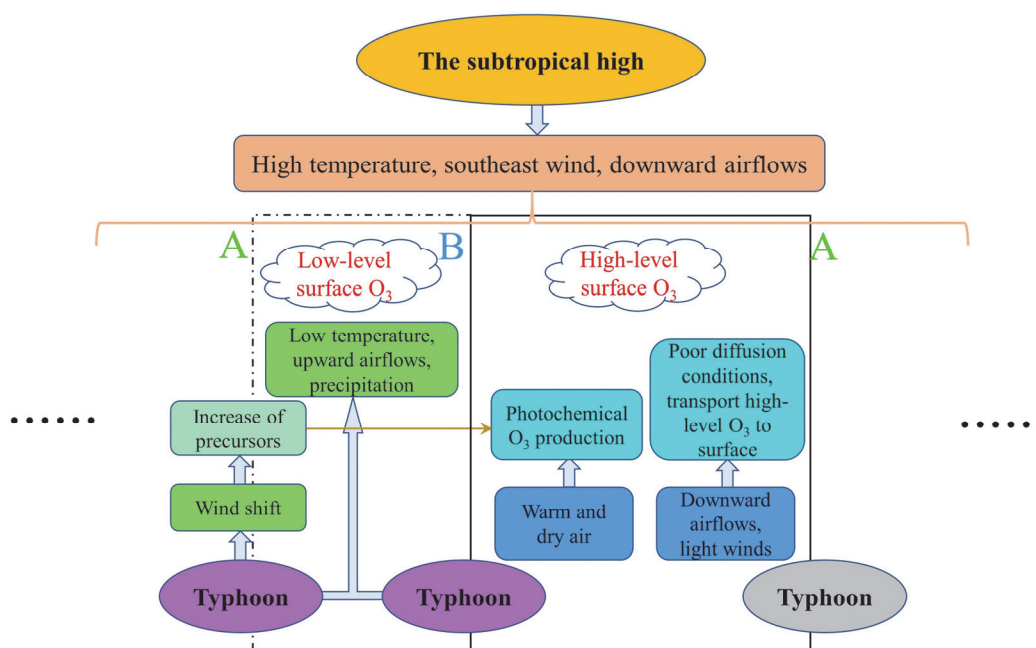

557

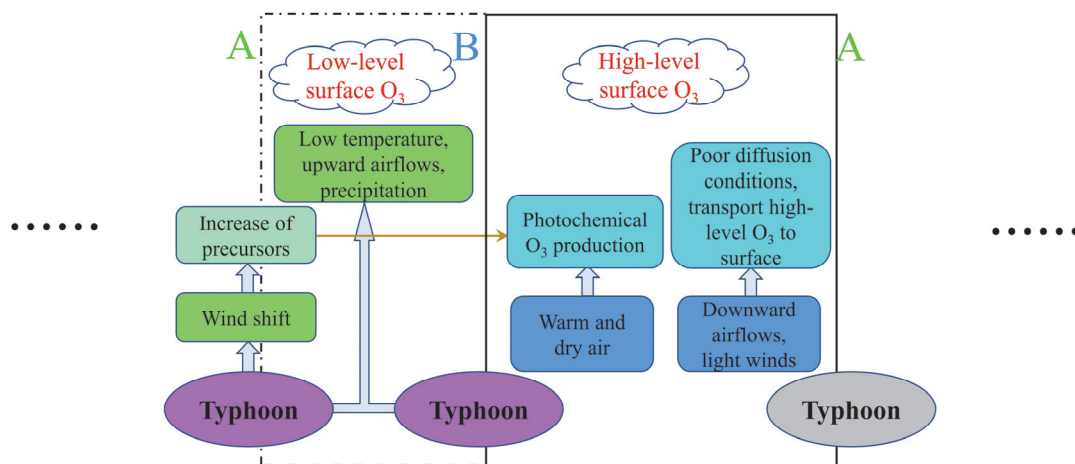

558  
 559 **Figure 11. A schematic diagram of major processes that summertime O<sub>3</sub> is affected by landfall**  
 560 **typhoons in the YRD. The letter A indicates the moment that the typhoon has reached the 24-**  
 561 **h warning line, and letter B indicates the last moment when typhoon remains active**  
 562 **in the mainland China.**

563  
 564 Typhoon can exert an enormous impact on energy transports and air mass in the troposphere  
 565 as well as redistribution of pollutants. Though ~~In fact~~, most typhoons generated over the western  
 566 North Pacific will not land in China, or they are more likely to land in the South China rather than  
 567 the YRD. In our previous study (Shu et al., 2016), the typhoon did not land in the YRD, but the  
 568 processes ~~related to~~ high-level O<sub>3</sub> formation may be ~~the same~~ common. That is, the processes  
 569 shown in the ~~open box enclosed by dashed lines~~ dashed box in Figure 11, which are unique to landfall  
 570 typhoons, while the processes ~~inside the box enclosed by solid lines~~ in the solid box can be found  
 571 ~~between typhoons as long as the typhoons that can affect the YRD.~~ Transport of precursors,  
 572 downward airflows, high temperature and light wind are crucial factors, and ~~how big~~ the roles of  
 573 those factors play in O<sub>3</sub> episodes depends on behaviors of the typhoons and geographical locations  
 574 ~~of the cities~~ typhoon and city. ~~Q~~ It is hard to quantify these processes with just a few cases is a large  
 575 ~~challenge.~~ For example, ~~it is hard to find out~~ we cannot estimate whether the downward airflows are  
 576 ~~modulated~~ dominated by the subtropical high or the periphery circulation of typhoons since they  
 577 usually occur simultaneously. Furthermore, the behave of particulate matter is intriguing since high-  
 578 level PM<sub>2.5</sub> often occurs with high-level O<sub>3</sub> after typhoon, which is opposite to the suggestion  
 579 ~~different from previous studies~~ that high particulate matter concentrations inhibit the formation of

O<sub>3</sub> [in previous studies](#) (Li et al., 2005; Xing et al., 2017). This may be related to the heterogeneous reactions (Lou et al., 2014) but research on this issue is quite limited to date.

### 3.3 Premature mortalities induced by O<sub>3</sub> exposure

When it comes to typhoons, especially landfall typhoons, the first concern is the huge damage caused by extreme weathers. After [the passing of](#) typhoons, people are relieved and [go back busy](#) with their [lifework](#) as usual. However, our research indicates that high O<sub>3</sub> episodes are likely to occur in the short period after a typhoon [landing](#) in the YRD, and high O<sub>3</sub> concentrations can do harm to people's health. To arouse attention on this issue, we estimate the premature mortality attributed to O<sub>3</sub> for respiratory disease, we choose two complete cycles, which is the period A1A3 (21 July to 11 August), to do the calculation. [In this study, we employ the standard damage function defined by epidemiology studies \(Anenverg et al., 2010; Voorhees et al., 2014\) to calculate the premature mortalities due to O<sub>3</sub> exposure, the specific formulas and parameters are described in Section 2.7.](#) Table 4 summarized the premature mortalities in cities in the YRD. The premature mortalities are a function of both the population and O<sub>3</sub> levels, resulting in high premature mortalities in populated and heavily polluted areas. Out of the 26 cities in the YRD, Shanghai [shows](#) highest premature mortalities (29.2) due to its high surface O<sub>3</sub> concentrations and huge population. The city with the lowest premature mortalities (0.6) [was](#) Zhoushan, which may be related to removing effect of the maritime air masses as Zhoushan is located by the sea (Figure 1b). During this period, the total premature mortalities in the YRD [was](#) 194.0, which [was](#) larger than the number of casualties caused directly by the typhoons (80 people were killed by landfall typhoons in mainland China in 2018).

**Table 4. Premature mortalities induced by O<sub>3</sub> exposure for respiratory disease**

|                   | City     | Population (thousand) | Premature mortalities |
|-------------------|----------|-----------------------|-----------------------|
| Category I cities | Shanghai | 24,240                | 29.2                  |
|                   | Yancheng | 7,200                 | 6.1                   |
|                   | Nantong  | 7,310                 | 7.9                   |
|                   | Jiaying  | 4,726                 | 7.3                   |
|                   | Ningbo   | 8,202                 | 8.1                   |
|                   | Zhoushan | 1,173                 | 0.6                   |

|                     |                    |        |       |
|---------------------|--------------------|--------|-------|
|                     | Taizhou            | 6,139  | 4.1   |
| Category II cities  | Hangzhou           | 9,806  | 16.5  |
|                     | Taizhoushi         | 4,636  | 5.2   |
|                     | Changzhou          | 4,729  | 4.4   |
|                     | Wuxi               | 6,575  | 10.7  |
|                     | Suzhou             | 10,722 | 15.3  |
|                     | Huzhou             | 3,027  | 2.8   |
|                     | Shaoxing           | 5,035  | 4.7   |
|                     | Jinhua             | 5,604  | 8.2   |
| Category III cities | Nanjing            | 8,436  | 13.4  |
|                     | Yangzhou           | 4,531  | 5.5   |
|                     | Zhenjiang          | 3,196  | 5.3   |
|                     | Chuzhou            | 4,114  | 5.8   |
|                     | Maanshan           | 2,337  | 3.6   |
|                     | Wuhu               | 3,748  | 6.2   |
|                     | Xuancheng          | 2,648  | 2.0   |
|                     | Category IV cities | Hefei  | 8,087 |
| Tongling            |                    | 1,629  | 1.7   |
| Chizhou             |                    | 1,475  | 2.1   |
| Anqing              |                    | 4,691  | 6.4   |
| Total               | 154,016            | 194.0  |       |

604

#### 605 4 Conclusions

606 In this study, we investigate the detail processes of landfall typhoons affecting O<sub>3</sub> in the YRD  
607 based on a unique case ~~from during~~ 16 July to 25 August, 2018, ~~using both with the help of~~  
608 monitoring observations and numerical simulations. This case was characterized by two multiday  
609 regional O<sub>3</sub> pollution episodes ~~involving concerned with~~ four successive landfall typhoons. The two  
610 O<sub>3</sub> episodes appeared from 24 July to 2 August and 5 to 11 August, respectively, with the highest  
611 MDA8 O<sub>3</sub> reached up 264 μg m<sup>-3</sup>.

612 The ~~time when a moment that~~ typhoon reaches the 24-h warning line and the ~~time when the~~  
613 ~~last moment of~~ typhoon ~~dies away activity~~ in the mainland China ~~are are~~ crucial, because O<sub>3</sub> pollution  
614 episodes mainly occurred during the period from the end of a typhoon ~~to and~~ the arrival of the next  
615 typhoon in the YRD. These two moments can be roughly regarded as time nodes. Furthermore, it is  
616 found that the variations of O<sub>3</sub> was related to the track, duration and landing intensity of the typhoons  
617 during the study period. O<sub>3</sub> pollution ~~first~~ appeared in ~~cities along the coastline coastal region was~~

618 ~~ahead of that in inland regions due to~~along the track of the typhoons. The interval between two  
619 typhoons can affect the duration of high O<sub>3</sub> concentration in the YRD. Generally, sustained high O<sub>3</sub>  
620 concentration ~~– likely appeared in the region on days when the existing typhoon had dissipated~~  
621 ~~before the arrival of the next one~~tends to appear on days when the typhoon has dissipated but not  
622 ~~influenced by the new one.~~ Regarding the impact of ~~As for~~ the landing intensity of typhoon, the  
623 stronger the typhoon landed, the gale and precipitation accompanying the typhoon ~~would~~ be more  
624 effective in ~~suppressing O<sub>3</sub> generation~~removing O<sub>3</sub>, resulting in lower O<sub>3</sub> concentration in the  
625 typhoon landing location.

626 The detail processes of landfall typhoons affecting O<sub>3</sub> depend on typhoons and cities. High  
627 temperature and downward airflows ~~dominated by the subtropical high~~ combined with abundant  
628 precursors are the main reasons for high O<sub>3</sub> concentration in the YRD in summer. And landfall  
629 typhoons can change this state through the following mechanism: When the landfall typhoon is  
630 close enough (~ 24-hour warning line), the prevailing southeast wind will change to southwest wind,  
631 which transports large amount of precursors from inland to the YRD. The southwest wind usually  
632 appears first in coastal regions, and the wind direction will turn ~~back~~ to southeast ~~wind~~ as long as  
633 the YRD is dominated by the subtropical high. Then the typhoon makes landfall, the low  
634 temperature, precipitation (upward airflows) and wild wind suppress the generation of O<sub>3</sub>. After the  
635 typhoon passing, the atmosphere ~~in~~at low layers (below 700 hPa) will be warm and dry, and  
636 downward airflows resume. The troposphere is likely to fill with high concentration of O<sub>3</sub> due to  
637 O<sub>3</sub>-rich air transported from the low stratosphere and strong photochemical reactions ~~begin to~~  
638 ~~produce O<sub>3</sub> under the abundance of precursors due to foreign sources superposed with local~~  
639 ~~emissions.~~ O<sub>3</sub> is mainly generated in the middle of boundary layer (~ 1000 m) instead of at the  
640 surface. The high-level O<sub>3</sub> can remain in the residual layer at night, and can be then transported to  
641 the surface by downward airflows or turbulent mixing by the second day. The downward airflows  
642 also obstruct the vertical diffusion of O<sub>3</sub>. Meanwhile, wind speed is light when the wind readjusts  
643 to southeast, which further ~~reduces~~worsens horizontal diffusion of O<sub>3</sub>. ~~Thus, The~~ O<sub>3</sub> can be  
644 accumulated and trapped on the ground. The thermal-dynamic effects results in high surface O<sub>3</sub>  
645 concentration in the YRD. Those processes will repeat if the next typhoon approaches.

646 The estimated premature mortalities attributed to O<sub>3</sub> exposure for respiratory disease in the  
647 YRD during 21 July to 11 August (two complete cycles of typhoons) ~~was~~is 194.0, which is larger

648 than the number of casualties caused directly by the typhoons. This work ~~has~~ enhanced our  
649 understanding of how landfall typhoons affect O<sub>3</sub> in the YRD, which may help ~~synthetically~~  
650 forecast ~~the~~ O<sub>3</sub> pollution ~~modulated~~~~synthetically~~ ~~impacted~~ by the subtropical high and typhoons.  
651 Meanwhile, our results further confirm that large-scale synoptic weather systems play an important  
652 role in regional air pollution, suggesting a need in establishing potential links between air pollution  
653 and predominant synoptic weather patterns.

654  
655 **Author contributions.** C. C. Zhan and M. Xie had the original ideas, designed the research, collected  
656 the data, and prepared the original draft. C. C. Zhan carried out the data analysis. M. Xie acquired  
657 financial support for the project leading to this publication. C. W. Huang taught and helped C. C.  
658 Zhan to do the numerical simulation. J. Liu and T. J. Wang ~~and J. Liu~~ revised the manuscript and  
659 helped to collect the data. C. Q. Ma helped to deal with the emission inventory. M. Xu and J. W. Yu  
660 helped to collect the data. M. M. Li, S. Li, B. L. Zhuang, and M. Zhao reviewed the initial draft and  
661 checked the English of the original manuscript. Y. M. Jiao and D. Y. Nie reviewed the initial draft  
662 and helped to improve the work of health impact.

#### 663 664 **Acknowledgements.**

665 This work was supported by the National Key Research and Development Program of China  
666 (2018YFC0213502, 2018YFC1506404), the open research fund of Chongqing Meteorological  
667 Bureau (KFJJ-201607) and the Fundamental Research Funds for the Central Universities  
668 (020714380047).

#### 669 670 **References**

- 671 Allen, R. J., Sherwood, S. C., Norris, J. R., and Zender, C. S.: Recent Northern Hemisphere tropical  
672 expansion primarily driven by black carbon and tropospheric ozone, *Nature*, 485, 350-354,  
673 10.1038/nature11097, 2012.
- 674 Anenberg, S. C., Horowitz, L. W., Tong, D. Q., and West, J. J.: An estimate of the global burden of  
675 anthropogenic ozone and fine particulate matter on premature human mortality using  
676 atmospheric modeling, *Environ Health Perspect*, 118, 1189-1195, 10.1289/ehp.0901220, 2010.
- 677 Burnett, R. T., Pope, C. A., 3rd, Ezzati, M., Olives, C., Lim, S. S., Mehta, S., Shin, H. H., Singh, G.,

678 Hubbell, B., Brauer, M., Anderson, H. R., Smith, K. R., Balme, J. R., Bruce, N. G., Kan, H.,  
679 Laden, F., Pruss-Ustun, A., Turner, M. C., Gapstur, S. M., Diver, W. R., and Cohen, A.: An  
680 integrated risk function for estimating the global burden of disease attributable to ambient fine  
681 particulate matter exposure, *Environ Health Perspect*, 122, 397-403, 10.1289/ehp.1307049,  
682 2014.

683 Chameides, W., and Walker, J. C. G.: A photochemical theory of tropospheric ozone, *Journal of*  
684 *Geophysical Research*, 78, 8751-8760, 10.1029/JC078i036p08751, 1973.

685 Chan, C. K., and Yao, X.: Air pollution in mega cities in China, *Atmospheric Environment*, 42, 1-  
686 42, 10.1016/j.atmosenv.2007.09.003, 2008.

687 Deng, T., Wang, T., Wang, S., Zou, Y., Yin, C., Li, F., Liu, L., Wang, N., Song, L., Wu, C., and Wu,  
688 D.: Impact of typhoon periphery on high ozone and high aerosol pollution in the Pearl River  
689 Delta region, *The Science of the total environment*, 668, 617-630,  
690 10.1016/j.scitotenv.2019.02.450, 2019.

691 Ding, A. J., Wang, T., Thouret, V., Cammas, J. P., and Nedelec, P.: Tropospheric ozone climatology  
692 over Beijing: analysis of aircraft data from the MOZAIC program, *Atmospheric Chemistry and*  
693 *Physics*, 8, 1-13, 2008.

694 Ding, A. J., Fu, C. B., Yang, X. Q., Sun, J. N., Zheng, L. F., Xie, Y. N., Herrmann, E., Nie, W., Petäjä,  
695 T., Kerminen, V. M., and Kulmala, M.: Ozone and fine particle in the western Yangtze River  
696 Delta: an overview of 1 yr data at the SORPES station, *Atmospheric Chemistry and Physics*,  
697 13, 5813-5830, 10.5194/acp-13-5813-2013, 2013.

698 Ding, A., Nie, W., Huang, X., Chi, X., Sun, J., Kerminen, V.-M., Xu, Z., Guo, W., Petäjä, T., Yang,  
699 X., Kulmala, M., and Fu, C.: Long-term observation of air pollution-weather/climate  
700 interactions at the SORPES station: a review and outlook, *Frontiers of Environmental Science*  
701 *& Engineering*, 10, 10.1007/s11783-016-0877-3, 2016.

702 Dong J Y, Liu X R, Zhang B Z.: Meta-analysis of association between short-term ozone exposure  
703 and population mortality in China, *Acta Scientiae Circumstantiae*, 36 (4), 1477-1485, 2016 (in  
704 Chinese).

705 Fan, Q., Lan, J., Liu, Y. M., Wang, X. M., Chan, P. W., Hong, Y. Y., Feng, Y. R., Liu, Y. X., Zeng, Y.  
706 J., and Liang, G. X.: Process analysis of regional aerosol pollution during spring in the Pearl  
707 River Delta region, China, *Atmospheric Environment*, 122, 829-838, 2015.



708 Ghude, S. D., Chate, D. M., Jena, C., Beig, G., Kumar, R., Barth, M. C., Pfister, G. G., Fadnavis, S.,  
709 and Pithani, P.: Premature mortality in India due to PM<sub>2.5</sub> and ozone exposure, *Geophys Res*  
710 *Lett*, 43, 4650-4658, 10.1002/2016gl068949, 2016.

711 Guo, S., Hu, M., Zamora, M. L., Peng, J., Shang, D., Zheng, J., Du, Z., Wu, Z., Shao, M., Zeng, L.,  
712 Molina, M. J., and Zhang, R.: Elucidating severe urban haze formation in China, *Proceedings*  
713 *of the National Academy of Sciences of the United States of America*, 111, 17373-17378,  
714 10.1073/pnas.1419604111, 2014.

715 Hu, J., Chen, J., Ying, Q., and Zhang, H.: One-year simulation of ozone and particulate matter in  
716 China using WRF/CMAQ modeling system, *Atmospheric Chemistry and Physics*, 16, 10333-  
717 10350, 10.5194/acp-16-10333-2016, 2016.

718 Huang, J.-P.: Numerical simulation and process analysis of typhoon-related ozone episodes in Hong  
719 Kong, *Journal of Geophysical Research*, 110, 10.1029/2004jd004914, 2005.

720 Huang, R. J., Zhang, Y., Bozzetti, C., Ho, K. F., Cao, J. J., Han, Y., Daellenbach, K. R., Slowik, J.  
721 G., Platt, S. M., Canonaco, F., Zotter, P., Wolf, R., Pieber, S. M., Bruns, E. A., Crippa, M.,  
722 Ciarelli, G., Piazzalunga, A., Schwikowski, M., Abbaszade, G., Schnelle-Kreis, J.,  
723 Zimmermann, R., An, Z., Szidat, S., Baltensperger, U., El Haddad, I., and Prevot, A. S.: High  
724 secondary aerosol contribution to particulate pollution during haze events in China, *Nature*,  
725 514, 218-222, 10.1038/nature13774, 2014.

726 Jerrett, M., Burnett, R. T., Pope, C. A., Ito, K., Thurston, G., Krewski, D., Shi, Y. L., Calle, E., and  
727 Thun, M.: Long-Term Ozone Exposure and Mortality., *New Engl J Med*, 360, 1085-1095, 2009.

728 [Jiang, Y. C., Zhao, T. L., Liu, J., Xu, X. D., Tan, C. H., Cheng, X. H., Bi, X. Y., Gan, J. B., You, J.](#)  
729 [F., and Zhao, S. Z.: Why does surface ozone peak before a typhoon landing in southeast China?,](#)  
730 [Atmospheric Chemistry and Physics, 15, 13331-13338, 10.5194/acp-15-13331-2015, 2015.](#)

731 Jiménez, P. A., and Dudhia, J.: Improving the Representation of Resolved and Unresolved  
732 Topographic Effects on Surface Wind in the WRF Model, *Journal of Applied Meteorology and*  
733 *Climatology*, 51, 300-316, 10.1175/jamc-d-11-084.1, 2012.

734 Jin, Y., Andersson, H., and Zhang, S.: Air Pollution Control Policies in China: A Retrospective and  
735 Prospects, *Int J Environ Res Public Health*, 13, 10.3390/ijerph13121219, 2016.

736 Kamens, R., Jang, M., Chien, C. J., and Leach, K.: Aerosol formation from the reaction of alpha-  
737 pinene and ozone using a gas-phase kinetics aerosol partitioning model, *Environmental*

738 Science & Technology, 33, 1430-1438, 1999.

739 Kan, H., Chen, R., and Tong, S.: Ambient air pollution, climate change, and population health in  
740 China, *Environ Int*, 42, 10-19, 10.1016/j.envint.2011.03.003, 2012.

741 Khoder, M. I.: Atmospheric conversion of sulfur dioxide to particulate sulfate and nitrogen dioxide  
742 to particulate nitrate and gaseous nitric acid in an urban area, *Chemosphere*, 49, 675-684, 2002.

743 Lelieveld, J., Evans, J. S., Fnais, M., Giannadaki, D., and Pozzer, A.: The contribution of outdoor  
744 air pollution sources to premature mortality on a global scale, *Nature*, 525, 367-371,  
745 10.1038/nature15371, 2015.

746 Li, L., Chen, C. H., Fu, J. S., Huang, C., Streets, D. G., Huang, H. Y., Zhang, G. F., Wang, Y. J.,  
747 Jang, C. J., Wang, H. L., Chen, Y. R., and Fu, J. M.: Air quality and emissions in the Yangtze  
748 River Delta, China, *Atmospheric Chemistry and Physics*, 11, 1621-1639, 10.5194/acp-11-  
749 1621-2011, 2011.

750 Li, L., Chen, C. H., Huang, C., Huang, H. Y., Zhang, G. F., Wang, Y. J., Wang, H. L., Lou, S. R.,  
751 Qiao, L. P., Zhou, M., Chen, M. H., Chen, Y. R., Streets, D. G., Fu, J. S., and Jang, C. J.: Process  
752 analysis of regional ozone formation over the Yangtze River Delta, China using the Community  
753 Multi-scale Air Quality modeling system, *Atmospheric Chemistry and Physics*, 12, 10971-  
754 10987, 2012.

755 Li, S. H., and Hong, H. P.: Typhoon wind hazard estimation for China using an empirical track  
756 model, *Natural Hazards*, 82, 1009-1029, 10.1007/s11069-016-2231-2, 2016.

757 Li, M., Liu, H., Geng, G., Hong, C., Liu, F., Song, Y., Tong, D., Zheng, B., Cui, H., Man, H., Zhang,  
758 Q., and He, K.: Anthropogenic emission inventories in China: a review, *National Science*  
759 *Review*, 4, 834-866, 10.1093/nsr/nwx150, 2017.

760 Li, M., Wang, T., Xie, M., Zhuang, B., Li, S., Han, Y., and Chen, P.: Impacts of aerosol-radiation  
761 feedback on local air quality during a severe haze episode in Nanjing megacity, eastern China,  
762 *Tellus B: Chemical and Physical Meteorology*, 69, 10.1080/16000889.2017.1339548, 2017.

763 Li, M., Wang, T., Xie, M., Zhuang, B., Li, S., Han, Y., Song, Y., and Cheng, N.: Improved  
764 meteorology and ozone air quality simulations using MODIS land surface parameters in the  
765 Yangtze River Delta urban cluster, China, *Journal of Geophysical Research: Atmospheres*, 122,  
766 3116-3140, 10.1002/2016jd026182, 2017.

767 Li, S., Wang, T., Huang, X., Pu, X., Li, M., Chen, P., Yang, X.-Q., and Wang, M.: Impact of East

768 Asian Summer Monsoon on Surface Ozone Pattern in China, *Journal of Geophysical Research:*  
769 *Atmospheres*, 123, 1401-1411, 10.1002/2017jd027190, 2018.

770 Li, M., Wang, T., Xie, M., Li, S., Zhuang, B., Huang, X., Chen, P., Zhao, M., and Liu, J.: Formation  
771 and Evolution Mechanisms for Two Extreme Haze Episodes in the Yangtze River Delta Region  
772 of China During Winter 2016, *Journal of Geophysical Research: Atmospheres*, 124, 3607-3623,  
773 10.1029/2019jd030535, 2019.

774 Liao, J., Wang, T., Jiang, Z., Zhuang, B., Xie, M., Yin, C., Wang, X., Zhu, J., Fu, Y., and Zhang, Y.:  
775 WRF/Chem modeling of the impacts of urban expansion on regional climate and air pollutants  
776 in Yangtze River Delta, China, *Atmospheric Environment*, 106, 204-214,  
777 10.1016/j.atmosenv.2015.01.059, 2015.

778 Liao, Z., Gao, M., Sun, J., and Fan, S.: The impact of synoptic circulation on air quality and  
779 pollution-related human health in the Yangtze River Delta region, *The Science of the total*  
780 *environment*, 607-608, 838-846, 10.1016/j.scitotenv.2017.07.031, 2017.

781 Liu, D., Pang, L., and Xie, B.: Typhoon disaster in China: prediction, prevention, and mitigation,  
782 *Natural Hazards*, 49, 421-436, 10.1007/s11069-008-9262-2, 2009.

783 Liu, H., Liu, S., Xue, B. R., Lv, Z. F., Meng, Z. H., Yang, X. F., Xue, T., Yu, Q., and He, K. B.:  
784 Ground-level ozone pollution and its health impacts in China, *Atmospheric Environment*, 173,  
785 223-230, 2018.

786 Lou, S., Liao, H., and Zhu, B.: Impacts of aerosols on surface-layer ozone concentrations in China  
787 through heterogeneous reactions and changes in photolysis rates, *Atmospheric Environment*,  
788 85, 123-138, 10.1016/j.atmosenv.2013.12.004, 2014.

789 Lu, X., Hong, J., Zhang, L., Cooper, O. R., Schultz, M. G., Xu, X., Wang, T., Gao, M., Zhao, Y., and  
790 Zhang, Y.: Severe Surface Ozone Pollution in China: A Global Perspective, *Environmental*  
791 *Science & Technology Letters*, 5, 487-494, 10.1021/acs.estlett.8b00366, 2018.

792 Monks, P. S., Archibald, A. T., Colette, A., Cooper, O., Coyle, M., Derwent, R., Fowler, D., Granier,  
793 C., Law, K. S., Mills, G. E., Stevenson, D. S., Tarasova, O., Thouret, V., von Schneidmesser,  
794 E., Sommariva, R., Wild, O., and Williams, M. L.: Tropospheric ozone and its precursors from  
795 the urban to the global scale from air quality to short-lived climate forcer, *Atmospheric*  
796 *Chemistry and Physics*, 15, 8889-8973, 10.5194/acp-15-8889-2015, 2015.

797 Shu, L., Xie, M., Wang, T., Gao, D., Chen, P., Han, Y., Li, S., Zhuang, B., and Li, M.: Integrated

798 studies of a regional ozone pollution synthetically affected by subtropical high and typhoon  
799 system in the Yangtze River Delta region, China, *Atmospheric Chemistry and Physics*, 16,  
800 15801-15819, 10.5194/acp-16-15801-2016, 2016.

801 Shu, L., Xie, M., Gao, D., Wang, T., Fang, D., Liu, Q., Huang, A., and Peng, L.: Regional severe  
802 particle pollution and its association with synoptic weather patterns in the Yangtze River Delta  
803 region, China, *Atmospheric Chemistry and Physics*, 17, 12871-12891, 10.5194/acp-17-12871-  
804 2017, 2017.

805 Tang, X.Y., Li, J.L., Dong, Z.X., Wang, Y.Y., Wang, W.X., Qi, L.W., Liu, X.L., Zhang, Y.T., Zhang,  
806 X.J., Tian, B.S., Jin, S.W., Yang, L.Q., Zhang, Y.X., 1989. Photochemical pollution in Lanzhou,  
807 China - a case study. *J. Environ. Sci. China* 1, 31e38.

808 Van Dingenen, R., Dentener, F. J., Raes, F., Krol, M. C., Emberson, L., and Cofala, J.: The global  
809 impact of ozone on agricultural crop yields under current and future air quality legislation,  
810 *Atmospheric Environment*, 43, 604-618, 10.1016/j.atmosenv.2008.10.033, 2009.

811 Voorhees, A. S., Wang, J., Wang, C., Zhao, B., Wang, S., and Kan, H.: Public health benefits of  
812 reducing air pollution in Shanghai: a proof-of-concept methodology with application to  
813 BenMAP, *The Science of the total environment*, 485-486, 396-405,  
814 10.1016/j.scitotenv.2014.03.113, 2014.

815 Wang, T., and Kwok, J. Y. H.: Measurement and analysis of a multiday photochemical smog episode  
816 in the Pearl River delta of China, *J Appl Meteorol*, 42, 404-416, 2003.

817 Wang, X., Zhang, Y., Hu, Y., Zhou, W., Lu, K., Zhong, L., Zeng, L., Shao, M., Hu, M., and Russell,  
818 A. G.: Process analysis and sensitivity study of regional ozone formation over the Pearl River  
819 Delta, China, during the PRIDE-PRD2004 campaign using the Community Multiscale Air  
820 Quality modeling system, *Atmospheric Chemistry and Physics*, 10, 4423-4437, 10.5194/acp-  
821 10-4423-2010, 2010.

822 Wang, M., Cao, C., Li, G., and Singh, R. P.: Analysis of a severe prolonged regional haze episode  
823 in the Yangtze River Delta, China, *Atmospheric Environment*, 102, 112-121,  
824 10.1016/j.atmosenv.2014.11.038, 2015.

825 Wang, T., Xue, L., Brimblecombe, P., Lam, Y. F., Li, L., and Zhang, L.: Ozone pollution in China:  
826 A review of concentrations, meteorological influences, chemical precursors, and effects, *The  
827 Science of the total environment*, 575, 1582-1596, 10.1016/j.scitotenv.2016.10.081, 2017.

828 Wang, T., Gao, T., Zhang, H., Ge, M., Lei, H., Zhang, P., Zhang, P., Lu, C., Liu, C., Zhang, H.,  
829 Zhang, Q., Liao, H., Kan, H., Feng, Z., Zhang, Y., Qie, X., Cai, X., Li, M., Liu, L., and Tong,  
830 S.: Review of Chinese atmospheric science research over the past 70 years: Atmospheric  
831 physics and atmospheric environment, *Science China Earth Sciences*, 62, 1903-1945,  
832 10.1007/s11430-019-9536-1, 2019.

833 Wei, X., Lam, K.-s., Cao, C., Li, H., and He, J.: Dynamics of the Typhoon Haitang Related High  
834 Ozone Episode over Hong Kong, *Advances in Meteorology*, 2016, 1-12,  
835 10.1155/2016/6089154, 2016.

836 Xie, M., Zhu, K., Wang, T., Yang, H., Zhuang, B., Li, S., Li, M., Zhu, X., and Ouyang, Y.:  
837 Application of photochemical indicators to evaluate ozone nonlinear chemistry and pollution  
838 control countermeasure in China, *Atmospheric Environment*, 99, 466-473,  
839 10.1016/j.atmosenv.2014.10.013, 2014.

840 Xie, M., Liao, J., Wang, T., Zhu, K., Zhuang, B., Han, Y., Li, M., and Li, S.: Modeling of the  
841 anthropogenic heat flux and its effect on regional meteorology and air quality over the Yangtze  
842 River Delta region, China, *Atmospheric Chemistry and Physics*, 16, 6071-6089, 10.5194/acp-  
843 16-6071-2016, 2016.

844 Xie, M., Zhu, K., Wang, T., Chen, P., Han, Y., Li, S., Zhuang, B., and Shu, L.: Temporal  
845 characterization and regional contribution to O<sub>3</sub> and NO<sub>x</sub> at an urban and a suburban site in  
846 Nanjing, China, *The Science of the total environment*, 551-552, 533-545,  
847 10.1016/j.scitotenv.2016.02.047, 2016.

848 Xie, M., Shu, L., Wang, T.-j., Liu, Q., Gao, D., Li, S., Zhuang, B.-l., Han, Y., Li, M.-m., and Chen,  
849 P.-l.: Natural emissions under future climate condition and their effects on surface ozone in the  
850 Yangtze River Delta region, China, *Atmospheric Environment*, 150, 162-180,  
851 10.1016/j.atmosenv.2016.11.053, 2017.

852 Xu, X., Lin, W., Wang, T., Yan, P., Tang, J., Meng, Z., and Wang, Y.: Long-term trend of surface  
853 ozone at a regional background station in eastern China 1991-2006: enhanced variability,  
854 *Atmospheric Chemistry and Physics*, 8, 2595-2607, 2008.

855 Xue, L. K., Wang, T., Gao, J., Ding, A. J., Zhou, X. H., Blake, D. R., Wang, X. F., Saunders, S. M.,  
856 Fan, S. J., Zuo, H. C., Zhang, Q. Z., and Wang, W. X.: Ground-level ozone in four Chinese  
857 cities: precursors, regional transport and heterogeneous processes, *Atmospheric Chemistry and*

858 Physics, 14, 13175-13188, 10.5194/acp-14-13175-2014, 2014.

859 Yang, J. X., Lau, A. K. H., Fung, J. C. H., Zhou, W., and Wenig, M.: An air pollution episode and  
860 its formation mechanism during the tropical cyclone Nuri's landfall in a coastal city of south  
861 China, *Atmospheric Environment*, 54, 746-753, 10.1016/j.atmosenv.2011.12.023, 2012.

862 Ying, M., Zhang, W., Yu, H., Lu, X., Feng, J., Fan, Y., Zhu, Y., and Chen, D.: An Overview of the  
863 China Meteorological Administration Tropical Cyclone Database, *Journal of Atmospheric and*  
864 *Oceanic Technology*, 31, 287-301, 10.1175/jtech-d-12-00119.1, 2014.

865 Zhan, C.-c., Xie, M., Fang, D.-x., Wang, T.-j., Wu, Z., Lu, H., Li, M.-m., Chen, P.-l., Zhuang, B.-l.,  
866 Li, S., Zhang, Z.-q., Gao, D., Ren, J.-y., and Zhao, M.: Synoptic weather patterns and their  
867 impacts on regional particle pollution in the city cluster of the Sichuan Basin, China,  
868 *Atmospheric Environment*, 208, 34-47, 10.1016/j.atmosenv.2019.03.033, 2019.

869 Zhang, Q. A., Wu, L. G., and Liu, Q. F.: Tropical Cyclone Damages in China 1983-2006, *Bulletin*  
870 *of the American Meteorological Society*, 90, 489-+, 2009.

871 Zhao, C., Wang, Y., Yang, Q., Fu, R., Cunnold, D., and Choi, Y.: Impact of East Asian summer  
872 monsoon on the air quality over China: View from space, *Journal of Geophysical Research*,  
873 115, 10.1029/2009jd012745, 2010.

874 Zhao, K., Li, X., Xue, M., Jou, B. J.-D., and Lee, W.-C.: Short-term forecasting through intermittent  
875 assimilation of data from Taiwan and mainland China coastal radars for Typhoon Meranti  
876 (2010) at landfall, *Journal of Geophysical Research: Atmospheres*, 117, n/a-n/a,  
877 10.1029/2011jd017109, 2012.

878
